# Supplementary material
Source: PubMed Central journal article supplement (PMC7617220)
Supplement: EMS143944-supplement-Supplementary_Information.pdf [file EMS143944-supplement-Supplementary_Information.pdf]

## **SUPPLEMENTARY INFORMATION**

**Dysregulation of macrophage PEPD in obesity determines adipose tissue fibro-inflammation and insulin resistance**

*V Pellegrinelli et al*

Corresponding authors: [vp332@medschl.cam.ac.uk](mailto:vp332@medschl.cam.ac.uk)(VP); [ajv22@medschl.cam.ac.uk](mailto:ajv22@medschl.cam.ac.uk) (AV-P).

## Supplementary Information Guide

### Supplementary Tables (10)

*Table S1:* RNA-Seq reads mapped to the ENSEMBLE version GRCm38.p5 of the mouse reference genome sequence (GRCm38.p5) using STAR v2.5.

*Table S2:* Differentially expressed genes (DEGs) in GnW (a) and liver (b) from *pepd* HET mice versus *pepd* WT mice fed HFD 45%.

*Table S3:* Differentially expressed genes (DEGs) in GnW (a) and liver (b) from *pepd* KO mice versus *pepd* WT mice fed HFD 45%.

*Table S4:* Pathway enrichment analyses of the DEGs in GnW (a) and liver (b) from *Table S2*, performed with PIANO, using the gene set collection C2 retrieved from the Molecular Signatures Database (MSigDB).

*Table S5:* Pathway enrichment analyses of the DEGs in GnW (a) and liver (b) from *Table S3*, performed with PIANO, using the gene set collection C2 retrieved from the Molecular Signatures Database (MSigDB).

*Table S6:* Differentially expressed genes (DEGs) in GnW (a) and liver (b) from *pepd* WT mice fed HFD 45% versus *pepd* WT mice fed chow diet.

*Table S7:* Differentially expressed genes (DEGs) in GnW (a) and liver (b) from *pepd* HET mice fed HFD 45% versus *pepd* HET mice fed chow diet

*Table S8:* Differentially expressed genes (DEGs) in GnW (a) and liver (b) from *pepd* KO mice fed HFD 45% versus *pepd* KO mice fed chow diet

*Table S9:* Reagents and resources used in the study

*Supplementary Table 10:* Mouse and human gene primers used for RT-qPCR.

Table S2-S8 are available online as separate files. Statistical analysis of the RNAseq data is detailed in the methods section.

**Table S1:** RNA-Seq reads mapped to the ENSEMBLE version GRCm38.p5 of the mouse reference genome sequence (GRCm38.p5) using STAR v2.5.

| Sample    | Diet   | Genotype | PEPD ID  | Total Reads | Uniquely Mapped Reads | Uniquely Mapped Reads % | Multi Mapped Reads | Multi Mapped Reads % |
|-----------|--------|----------|----------|-------------|-----------------------|-------------------------|--------------------|----------------------|
| D707_D501 | Chow   | KO       | PEPD 301 | 8735979     | 7360900               | 84,25%                  | 1035473            | 11,85%               |
| D707_D502 | Chow   | HET      | PEPD 306 | 8043290     | 6846911               | 85,12%                  | 1002534            | 12,46%               |
| D707_D503 | 45%HFD | KO       | PEPD 312 | 8130998     | 7052352               | 86,73%                  | 855073             | 10,51%               |
| D707_D504 | 45%HFD | HET      | PEPD 313 | 8367299     | 7184651               | 85,86%                  | 862205             | 10,30%               |
| D707_D505 | 45%HFD | HET      | PEPD 314 | 7747695     | 6698573               | 86,45%                  | 789286             | 10,18%               |
| D707_D506 | 45%HFD | WT       | PEPD 322 | 8104649     | 7015226               | 86,55%                  | 855592             | 10,55%               |
| D707_D508 | 45%HFD | HET      | PEPD 324 | 8639457     | 7343993               | 85,00%                  | 916753             | 10,61%               |
| D708_D501 | Chow   | HET      | PEPD 339 | 8456056     | 6960791               | 82,31%                  | 1058178            | 12,51%               |
| D708_D502 | 45%HFD | KO       | PEPD 340 | 6802037     | 5761678               | 84,70%                  | 713189             | 10,48%               |
| D708_D503 | Chow   | HET      | PEPD 341 | 7709896     | 6688513               | 86,75%                  | 772386             | 10,01%               |
| D708_D504 | Chow   | KO       | PEPD 346 | 7923319     | 6620298               | 83,55%                  | 997556             | 12,59%               |
| D708_D505 | Chow   | WT       | PEPD 347 | 7830084     | 6691002               | 85,45%                  | 812673             | 10,37%               |
| D708_D506 | Chow   | HET      | PEPD 355 | 8211241     | 7039867               | 85,73%                  | 931646             | 11,34%               |
| D708_D507 | Chow   | HET      | PEPD 357 | 7362327     | 6323510               | 85,89%                  | 841495             | 11,42%               |
| D708_D508 | Chow   | KO       | PEPD 358 | 8119382     | 6962802               | 85,75%                  | 871184             | 10,72%               |
| D709_D501 | 45%HFD | WT       | PEPD 360 | 7608713     | 6450883               | 84,78%                  | 808492             | 10,62%               |
| D709_D502 | 45%HFD | KO       | PEPD 361 | 7409409     | 6293567               | 84,94%                  | 870649             | 11,75%               |
| D709_D503 | 45%HFD | KO       | PEPD 374 | 6666850     | 5745494               | 86,18%                  | 743072             | 11,14%               |
| D709_D504 | 45%HFD | WT       | PEPD 376 | 6469272     | 5591603               | 86,43%                  | 676126             | 10,45%               |
| D709_D505 | 45%HFD | HET      | PEPD 382 | 7380531     | 6297858               | 85,33%                  | 738923             | 10,01%               |
| D709_D506 | 45%HFD | WT       | PEPD 383 | 6836072     | 5901656               | 86,33%                  | 781248             | 11,42%               |
| D709_D507 | 45%HFD | HET      | PEPD 391 | 7184285     | 6161343               | 85,76%                  | 770128             | 10,71%               |

|           |        |     |             |         |         |        |        |        |
|-----------|--------|-----|-------------|---------|---------|--------|--------|--------|
| D710_D501 | Chow   | WT  | PEPD<br>393 | 8564670 | 7296485 | 85,19% | 922458 | 10,77% |
| D710_D502 | 45%HFD | KO  | PEPD<br>398 | 8227166 | 7008007 | 85,18% | 927791 | 11,27% |
| D710_D503 | 45%HFD | HET | PEPD<br>400 | 6182948 | 5307086 | 85,83% | 664276 | 10,74% |
| D710_D504 | 45%HFD | KO  | PEPD<br>545 | 7938676 | 6796124 | 85,60% | 839014 | 10,56% |
| D710_D505 | 45%HFD | KO  | PEPD<br>554 | 7391470 | 6166893 | 83,43% | 772445 | 10,45% |
| D710_D506 | 45%HFD | KO  | PEPD<br>555 | 8324283 | 7094824 | 85,23% | 908872 | 10,91% |
| D710_D507 | 45%HFD | HET | PEPD<br>556 | 7639865 | 6449993 | 84,42% | 772104 | 10,10% |
| D710_D508 | 45%HFD | HET | PEPD<br>557 | 8099599 | 6866629 | 84,77% | 851036 | 10,50% |
| D711_D501 | Chow   | WT  | PEPD<br>565 | 7448830 | 6237064 | 83,73% | 778531 | 10,45% |
| D711_D502 | Chow   | WT  | PEPD<br>568 | 8210613 | 6855045 | 83,49% | 823816 | 10,03% |
| D711_D503 | Chow   | KO  | PEPD<br>569 | 6002149 | 4729458 | 78,79% | 779978 | 12,99% |
| D711_D504 | 45%HFD | KO  | PEPD<br>585 | 7866984 | 6665392 | 84,72% | 951001 | 12,08% |
| D711_D505 | 45%HFD | WT  | PEPD<br>586 | 8457272 | 7164456 | 84,71% | 929763 | 10,99% |
| D711_D506 | 45%HFD | WT  | PEPD<br>587 | 8334038 | 7240383 | 86,87% | 938666 | 11,26% |
| D711_D507 | 45%HFD | HET | PEPD<br>588 | 7792220 | 6733692 | 86,41% | 836633 | 10,73% |
| D711_D508 | 45%HFD | WT  | PEPD<br>589 | 8414976 | 7262246 | 86,30% | 831210 | 9,88%  |
| D712_D501 | 45%HFD | WT  | PEPD<br>590 | 7408145 | 6344196 | 85,63% | 790868 | 10,67% |
| D712_D502 | 45%HFD | HET | PEPD<br>591 | 7459845 | 6403981 | 85,84% | 774005 | 10,37% |
| D712_D503 | Chow   | KO  | PEPD<br>592 | 7463886 | 6273586 | 84,05% | 782412 | 10,48% |
| D712_D504 | Chow   | HET | PEPD<br>595 | 7315992 | 6171088 | 84,35% | 763890 | 10,44% |
| D712_D505 | Chow   | HET | PEPD<br>596 | 7364463 | 6043417 | 82,06% | 817355 | 11,09% |
| D712_D507 | Chow   | HET | PEPD<br>597 | 7199724 | 6041573 | 83,91% | 737897 | 10,24% |

**Table S9:** Reagents and resources used in the study

| REAGENT or RESOURCE                                          | SOURCE            | IDENTIFIER                 |
|--------------------------------------------------------------|-------------------|----------------------------|
| <b>Antibodies</b>                                            |                   |                            |
| anti-collagen I                                              | Abcam             | ab21286, RRID:AB_446161    |
| anti- $\alpha$ SMA 1A4                                       | Sigma             | A2547, RRID:AB_476701      |
| anti- PEPD                                                   | Abcam             | ab86507, RRID:AB_1952335   |
| anti-phospho-NF- $\kappa$ B p65 (Ser536) (93H1)              | Cell signaling    | #3033, RRID:AB_331284      |
| anti-NF- $\kappa$ B p65                                      | Cell signaling    | #3034, RRID:AB_330561      |
| anti-beta Actin                                              | Abcam             | ab8227, RRID:AB_2305186    |
| anti-GADPH (D4C6R)                                           | Cell signalling   | #97166S, RRID:AB_2756824   |
| anti- $\beta$ -Tubulin                                       | Cell signalling   | #2146S, RRID:AB_2210545    |
| anti- phospho-AKT (Ser473) (D9E)                             | Cell signalling   | #4060, RRID:AB_2315049     |
| anti-AKT                                                     | Cell signalling   | #9272, RRID:AB_329827      |
| MACS mouse CD11b microbeads                                  | Miltnyibiotec     | 130-049-601, RRID:N/A      |
| Anti-rabbit IgG, HRP-linked                                  | Cell signaling    | #7074, RRID:AB_2099233     |
| Anti-mouse IgG, HRP-linked                                   | Cell signaling    | #7076, RRID:AB_330924      |
| Alexa555-conjugated anti-rabbit                              | Life technologies | A21428, RRID:AB_141784     |
| Alexa488-conjugated anti-mouse                               | Life technologies | A21202, RRID:AB_141607     |
| <b>Chemicals, siRNAs, Peptides, and Recombinant Proteins</b> |                   |                            |
| Prolidase from porcine kidney                                | Sigma-aldrich     | P6675-250UN; CAS:9025-32-5 |
| N-Benzyloxycarbonyl-L-proline                                | Alfa Aesar        | B21672.30; CAS: 1148-11-4  |
| Erlotinib hydrochloride                                      | Sigma-aldrich     | SML2156, 183319-69-9       |
| Lipopolysaccharide                                           | Sigma-aldrich     | L4391                      |
| Dexamethasone                                                | Sigma-aldrich     | D1756; CAS: 50-02-2        |
| Animal-free recombinant murine interleukin 4                 | Peptotech         | AF-214-14                  |
| Insulin (Actrapid 100 IU/ml)                                 | Novo Nordisk      | 1331415                    |
| Bodipy 493/503                                               | Life science      | D-3922                     |
| Phalloidin-iFluor 594 Reagent                                | Abcam             | ab176757                   |
| Hoechst 33342                                                | Thermofisher      | H3570                      |
| 45% HFD                                                      | Research Diets    | D12451                     |
| 58% HFD                                                      |                   | D12331                     |
| L-Glycyl-L-Proline                                           | Sigma-aldrich     | 5765594-5MG                |
| L-Proline                                                    | Sigma-aldrich     | P0380                      |
| Triton-X-100                                                 | Sigma-aldrich     | T-9284                     |

|                                                  |                                       |                                   |
|--------------------------------------------------|---------------------------------------|-----------------------------------|
| STAT60                                           | AMS Biotechnology                     | CS-502                            |
| Collagenase from Clostridium histolyticum type 2 | Sigma-aldrich                         | C6885                             |
| Bovine serum albumin                             | Sigma-aldrich                         | A8412                             |
| Lipofectamine™ LTX Reagent with PLUS™            | Thermofisher                          | 15338030                          |
| ON-TARGETplus Mouse Egfr siRNA                   | Horizon (Dharmacon)                   | L-040411-00-0010                  |
| ON-TARGETplus Non-targeting Control Pool         | Horizon (Dharmacon)                   | D-001810-10-20                    |
| Critical Commercial Assays                       |                                       |                                   |
| Free glycerol assay                              | Sigma-aldrich                         | F6428-40mL                        |
| LDH-Cytotoxicity Calorimetric Assay Kit II       | BioVision                             | #K313                             |
| Human PEPD (Peptidase D) ELISA Kit               | Elabsciences                          | E-EL-H5575.96                     |
| Proteome profile mouse phospho-RTK               | RD system                             | ARY014                            |
| Mouse Xaa-Pro dipeptidase (PEPD) ELISA kit       | CUSABIO                               | CSB-EL017784MO                    |
| RNeasy minikit (250)                             | Qiagen                                | 74106                             |
| RNA 6000 Nano Kit                                | Agilent                               | 5067-1511                         |
| TruSeq Stranded mRNA HT Sample Prep Kit          | Illumina                              | 20020595                          |
| Deposited Data                                   |                                       |                                   |
| RNAseq data mouse                                | This paper                            | N/A                               |
| Proteomic Data iPS                               | PRIDE repository                      | PXD001953                         |
| RNAseq data iPS                                  | European Genome-phenome Archive (EGA) | EGAS00001000563                   |
| Experimental Models: Cell Lines                  |                                       |                                   |
| 3T3L1 Cells                                      | Zen-Bio                               | SPL1F                             |
| RAW264.7 cells                                   | ATCC                                  | TIB-71                            |
| Experimental Models: Organisms/Strains           |                                       |                                   |
| C57Bl/6J                                         | Charles River                         | JAX™ Strain, RRID:IMSR_JAX:000664 |
| <i>C57BL/6J-Lepob</i>                            | Charles River                         | JAX™ Strain, RRID:IMSR_JAX:000632 |
| <i>Pepdtm1a(KOMP)Wtsi</i>                        | Wellcome Trust Sanger Institute       | MFPW; EPD0224_1_C04               |
| Oligonucleotides                                 |                                       |                                   |

|                                                                   |                                                                                                                                           |                  |
|-------------------------------------------------------------------|-------------------------------------------------------------------------------------------------------------------------------------------|------------------|
| Primers for mRNA expression                                       | This paper                                                                                                                                | See Table S10    |
| Human peptidase D ( <i>PEPD</i> )                                 | Applied Biosystems<br>Inc.                                                                                                                | Hs00944654_m1    |
| Fatty acid synthase ( <i>FASN</i> )                               |                                                                                                                                           | Hs00188012_m1    |
| Solute carrier family 2 member 4 ( <i>GLUT4</i> )                 |                                                                                                                                           | Hs00168966_m1    |
| Adiponectin ( <i>ADIPOQ</i> )                                     |                                                                                                                                           | Hs00605917_m1    |
| Peroxisome proliferator activated receptor gamma ( <i>PPARG</i> ) |                                                                                                                                           | Hs00234592_m1    |
| Cd68 ( <i>cd68</i> )                                              |                                                                                                                                           | Hs00154355_m1    |
| Tumor necrosis factor ( <i>TNF</i> )                              |                                                                                                                                           | Hs00174128_m1    |
| Collagen type VI alpha 3 chain ( <i>COL6A3</i> )                  |                                                                                                                                           | Hs00915125_m1    |
| Collagen type VI alpha 6 ( <i>COL6A6</i> )                        |                                                                                                                                           | Hs01029204_m1    |
| Collagen type IV alpha 1 chain ( <i>COL4A1</i> )                  |                                                                                                                                           | Hs00266237_m1    |
| Epidermal growth factor receptor ( <i>EGFR</i> )                  |                                                                                                                                           | Hs01076090_m1    |
| Software and Algorithms                                           |                                                                                                                                           |                  |
| GraphPad Prism7 and 8                                             | GraphPad Software                                                                                                                         | RRID: SCR_002798 |
| Fiji                                                              | Fiji                                                                                                                                      | RRID: SCR_002285 |
| Zeiss LSM 510 Meta Confocal microscope with LSM 3D software       | Carl Zeiss                                                                                                                                | N/A              |
| `piano` R package                                                 | Väremo et al., 2013 <sup>1</sup>                                                                                                          | N/A              |
| STAR v2.5.1b                                                      | Dobin et al., 2013 <sup>2</sup>                                                                                                           | N/A              |
| featureCounts v1.5                                                | Liao et al, 2013 <sup>3</sup>                                                                                                             | N/A              |
| Customized Python and R scripts                                   | Haak et al., 2018 <sup>4</sup> ;<br><a href="https://github.com/bpucker/RNA-Seq_analysis">https://github.com/bpucker/RNA-Seq_analysis</a> | N/A              |
| DESeq2                                                            | Love et al., 2014 <sup>5</sup>                                                                                                            | N/A              |

**Table S10:** Mouse and human gene primers used for RT-qPCR.

| Gene                | Forward primer (5'-3')            | Reverse primer (5'-3')             | Probe (5'-3')                         | Reporter /quencher |
|---------------------|-----------------------------------|------------------------------------|---------------------------------------|--------------------|
| <b>Murine</b>       |                                   |                                    |                                       |                    |
| <i>18s</i>          | CGG CTA CCA CAT CCA AGG AA        | GCT GGA ATT ACC GCG GCT            | GAG GGC AAG TCT GGT GCC AG            | FAM/TAMRA          |
| <i>36b4</i>         | AGA TGC AGC AGA TCC GCA T         | GTT CTT GCC CAT CAG CAC C          |                                       | SYBR               |
| <i>Bactin</i>       | GCT CTG GCT CCT AGC ACC AT        | GCC ACC GAT CCA CAC AGA GT         | ATC AAG ATC ATT GCT CCT GAG CGC       | FAM/TAMRA          |
| <i>B2m</i>          | ACT GAT ACA TAC GCC TGC AGA GTT   | TCA CAT GTC TCG ATC CCA GTA GA     |                                       | SYBR               |
| <i>Adrge1</i>       | CAG ATA CAG CAA TGC CAA GCA       | GAT TGT GAA GGT AGC ATT CAC AAG TG | 6TGC AGG GCA GGG ATC TTG GTT ATG C0   | FAM/TAMRA          |
| <i>Mrc1</i>         | GCA TGG GTT TTA CTG CTA CTT GAT T | CAG GAA TGC TTG TTC ATA TCT GTC TT |                                       | SYBR               |
| <i>Pparγ2</i>       | GAT GCA CTG CCT ATG AGC ACT T     | AGA GGT CCA CAG AGC TGA TTC C      | AGA GAT GCC ATT CTG GCC CCA CCA ACT T | FAM/TAMRA          |
| <i>Tnfa</i>         | CATCTTCTCAAATTCGAGTGACAA          | TGGGAGTAGACAAGGTACAACCC            | CACGTCGTAGCAAACCACC AAGTGGA           | FAM/TAMRA          |
| <i>Pepd</i>         | CGGCATGCGCCACACCTCTT              | TCGTCCGGTCATTGGGGGCT               |                                       | SYBR               |
| <i>Mmp9</i>         | GCCGACTTTTGTGGTCTTCC              | GGTACAAGTATGCCTCTGCCA              |                                       | SYBR               |
| <i>asma</i>         | TCCTGACGCTGAAGTATCCGAT            | GGTGCCAGATCTTTTCCATGTC             |                                       | SYBR               |
| <i>Col1a2</i>       | CATGCTCAGCTTTGTGGATACG            | CGTACTGATCCCGATTGCAA               |                                       |                    |
| <i>Col3a1</i>       | AAGGGCGAAGATGGCAAAGA              | AGCCACTAGGACCCCTTCT                |                                       |                    |
| <i>Col4a1</i>       | GGCCCCAAAGGTGTTGATG               | AGGTTCTCCCTTTTGACCTTGAG            |                                       |                    |
| <i>Col4a2</i>       | CCCATCTGACATCACACTTGTG            | TGAGATTACGCCGGGTATCC               |                                       |                    |
| <i>Col6a1</i>       | GATGAGGGTGAAGTGGGAG A             | CAGCACGAAGAGGATGTCAA               |                                       |                    |
| <i>Fn</i>           | GAGTGGAAGTGTGAGCGACA              | GGTGAGTCTGCGTTGGTAA                |                                       | SYBR               |
| <i>Cox2</i>         | CCCTGAAGCCGTACACATCA              | GTCAGTGTAGAGGGCTTTCAAT TCT         | TTGAAGAACTTACAGGAG AGAAGGAAATGGCTG    | SYBR               |
| <i>Glut4</i>        | ACTCATTCTTGGACGGTTCCT C           | CACCCGAAGATGAGTGGG                 |                                       |                    |
| <i>Adipone ctin</i> | CAGTGGATCTGACGACACCA A            | TGGGCAGGATTAAGAGGAACA              | AGG GCT CAG GAT GCT ACT GTT GCA AGC   | FAM/TAMRA          |
| <i>Leptin</i>       | AGCATCCACTGCTATGGTAGC A           | TCTTCTAGTCCCAAGCATTTTGG            |                                       |                    |



|                       |                                   |                               |                                      |                   |
|-----------------------|-----------------------------------|-------------------------------|--------------------------------------|-------------------|
| <i>Il6</i>            | ACA CAT GTT CTC TGG GAA<br>ATC GT | AAGTGCATCATCGTTGTTTCATA<br>CA | ATGAGAAAAGAGTTGTGC<br>AATGGCAATTCTGA | FAM/<br>TAMR<br>A |
| <i>Mgl1</i>           | TGCTGGTATTTGCCCATGAC              | CCGACACCACCATCCTCTCT          |                                      | SYBR              |
| <i>Il18</i>           | TGGGCCTCAAAGGAAAGAAT              | CAGGCTTGTGCTCTGCTTGT          |                                      | SYBR              |
| <i>Arg1</i>           | CATTTGGGTGGATGCTCACA              | TGGTACATCTGGGAACCTTCCTT<br>T  |                                      | SYBR              |
| <i>Fizz1</i>          | GGGATGACTGCTACTGGGTG              | TCAACGAGTAAGCACAGGCA          |                                      | SYBR              |
| <i>Clec10a</i>        | TGAGAAAGGCTTTAAGAACT<br>GGG       | GACCACCTGTAGTGATGTGGG         |                                      | SYBR              |
| <i>Adrp</i>           | TCATCCAGA<br>AAGCTGGAGCCA GCAGTC  | GCAGTCTTTCCTCCATCCTGTC        |                                      | SYBR              |
| <i>Fasn</i>           | GCCCAGACAGAGAAGAGGCA              | CTGACTCGGGCAACTTCCC           | GGAGGAGGTGGTGATAGC<br>CGGTATGTC      | FAM/<br>TAMR<br>A |
| <i>Myo D</i>          | AGCACTACAGTGGCGACTCA              | GGCCGCTGTAATCCATCA            |                                      |                   |
| <i>Myogeni<br/>n</i>  | CCTTGCTCAGCTCCCTCA                | TGGGAGTTGCATTCACTGG           |                                      |                   |
| <i>Myostat<br/>in</i> |                                   |                               |                                      |                   |
| <i>Ttn</i>            | GAGGTGCCGAAGAAACTTGT              | TTGGGTGCTTCCGGTACTT           |                                      |                   |
| <i>Cdkn1a</i>         | GAACATCTCAGGGCCGAAAA              | CAATCTGCGCTTGGAGTGATAG        |                                      |                   |
| <i>Ccnd1</i>          | CATCCATGCGGAAAATCGT               | TCTACGCACTTCTGCTCCTCA         |                                      |                   |
| <i>Tgfb1</i>          | GCAGTGGCTGAACCAAGGA               | AGAGCAGTGAGCGCTGAATC          |                                      |                   |
| Human cohort 1        |                                   |                               |                                      |                   |
| PLIN1                 | AAGTTGAAGCTTGAGGAGCG<br>AGG       | GCTCGCGATGGGAACGCTGA          |                                      | SYBR              |
| CIDEA                 | GAGGTCCAACGCAGTCCAGC<br>TG        | GTACGCACTGACACATGCCTGG<br>AG  |                                      | SYBR              |
| ADRP                  | GAGTCGTCTTCGGGACGCGC              | TTGGCAACTGCAATTTGCGGCT        |                                      | SYBR              |
| TIP47                 | TGCAGAGCGGCGTGGACAAG              | CGACCTGCTCTGGCTTGGGC          |                                      | SYBR              |
| Human cohort 2        |                                   |                               |                                      |                   |
| 18s                   | CGGCTACCACATCCAAGGAA              | GCTGGAATTACCGCGGCT            | GAGGGCAAGTCTGGTGCC<br>AGCA           | FAM/<br>TAMR<br>A |
| PEPD                  | TTCCGCCAGGAGTCCTTCTT              | GTCGTCCACGGCATACTTCT          |                                      | SYBR              |
