# Supplementary material
Source: PubMed Central journal article supplement (PMC7617220)

# Extended Data Figure 2

**h**

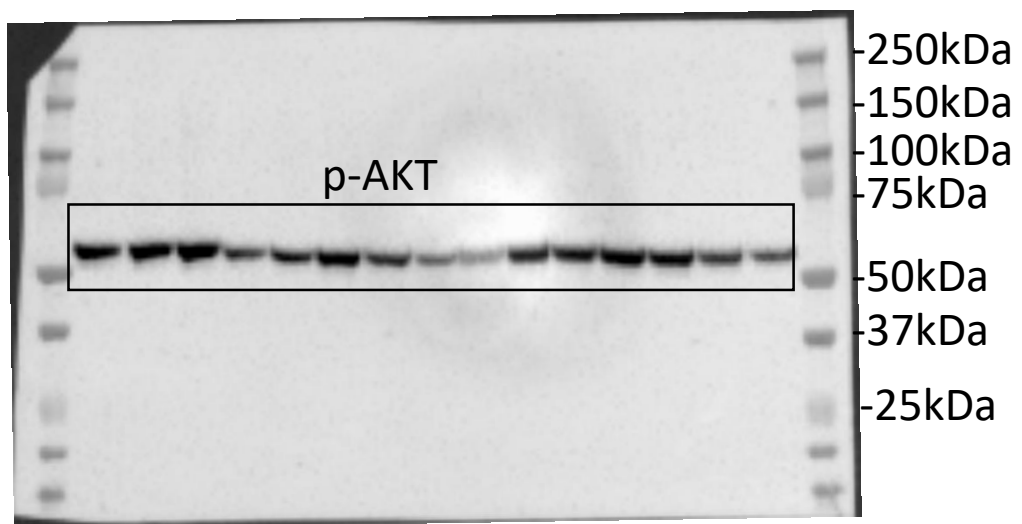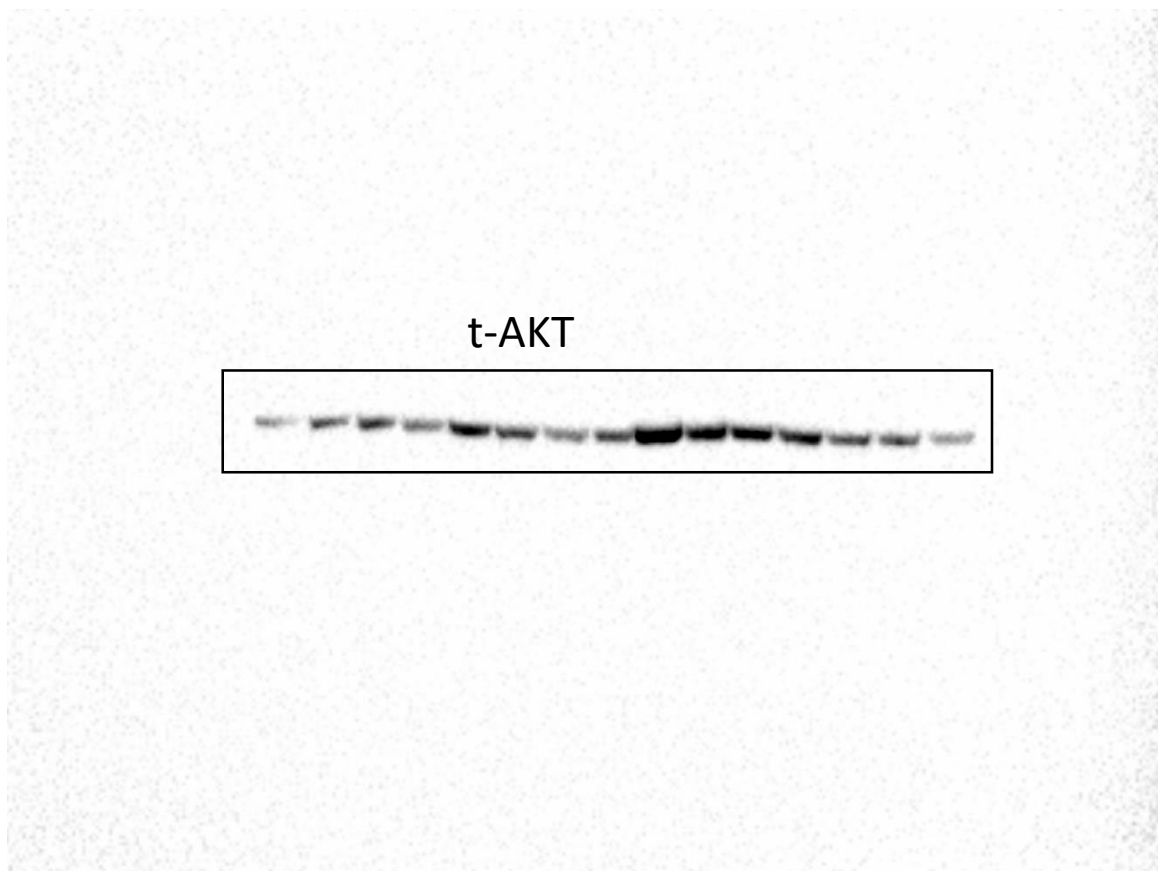

**i**

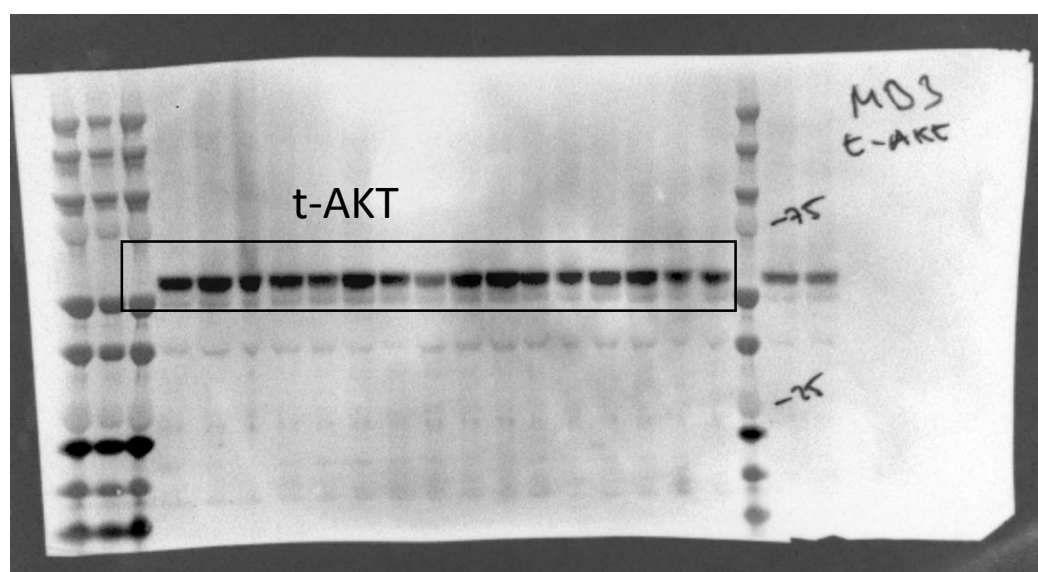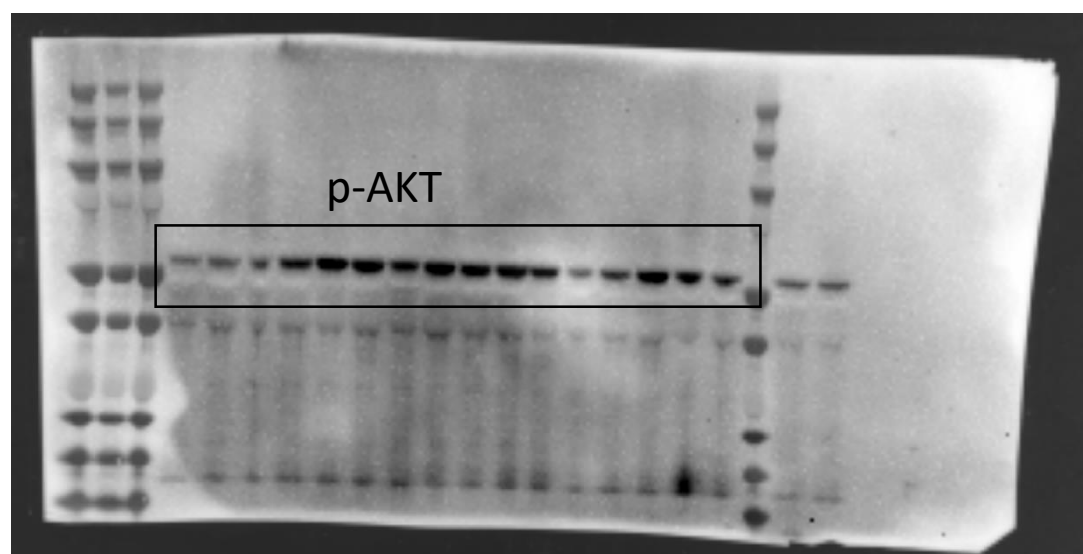

Supplement: EMS143944-supplement-Uncropped_WesternBlot_Extended_DataFigure2h_i.pdf [file EMS143944-supplement-Uncropped_WesternBlot_Extended_DataFigure2h_i.pdf]

# Extended Data Figure 3

**l**

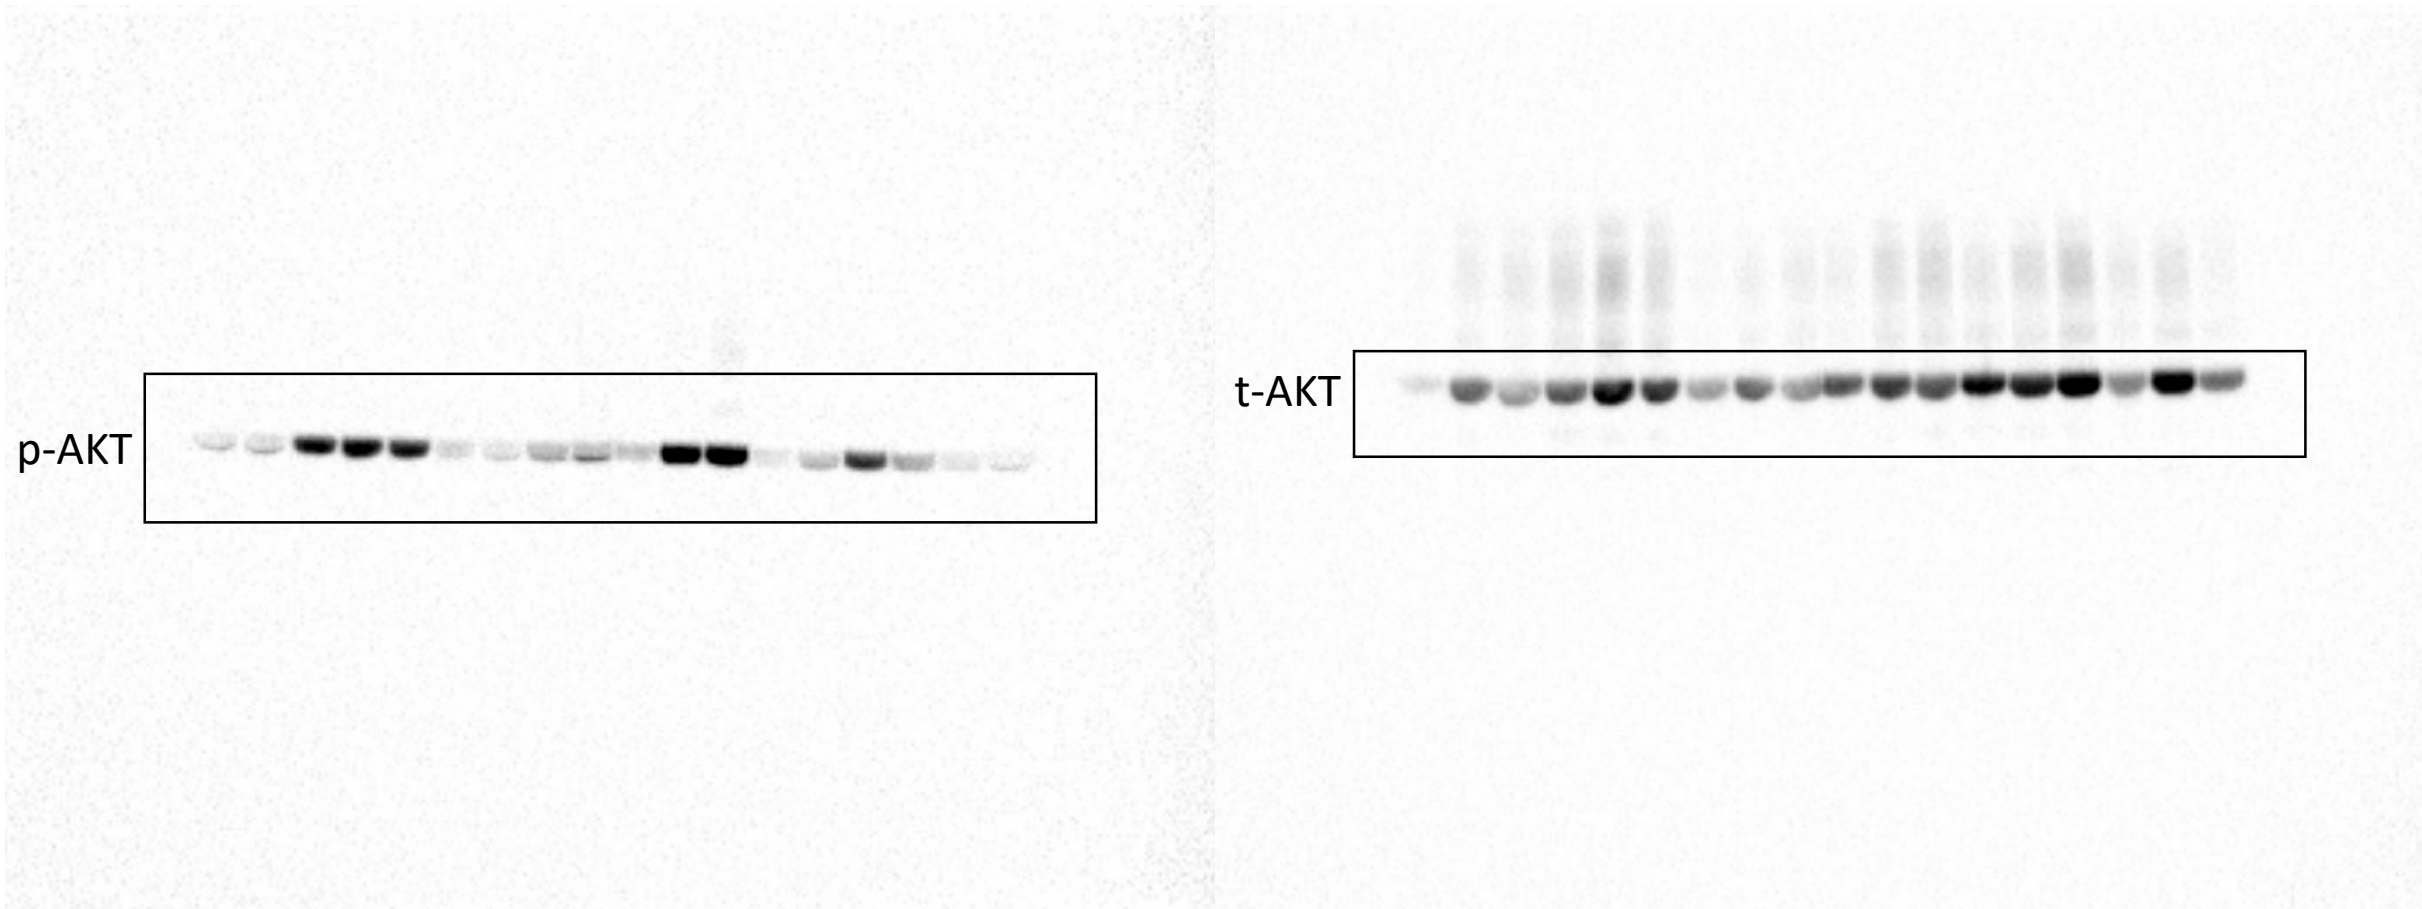

**m**

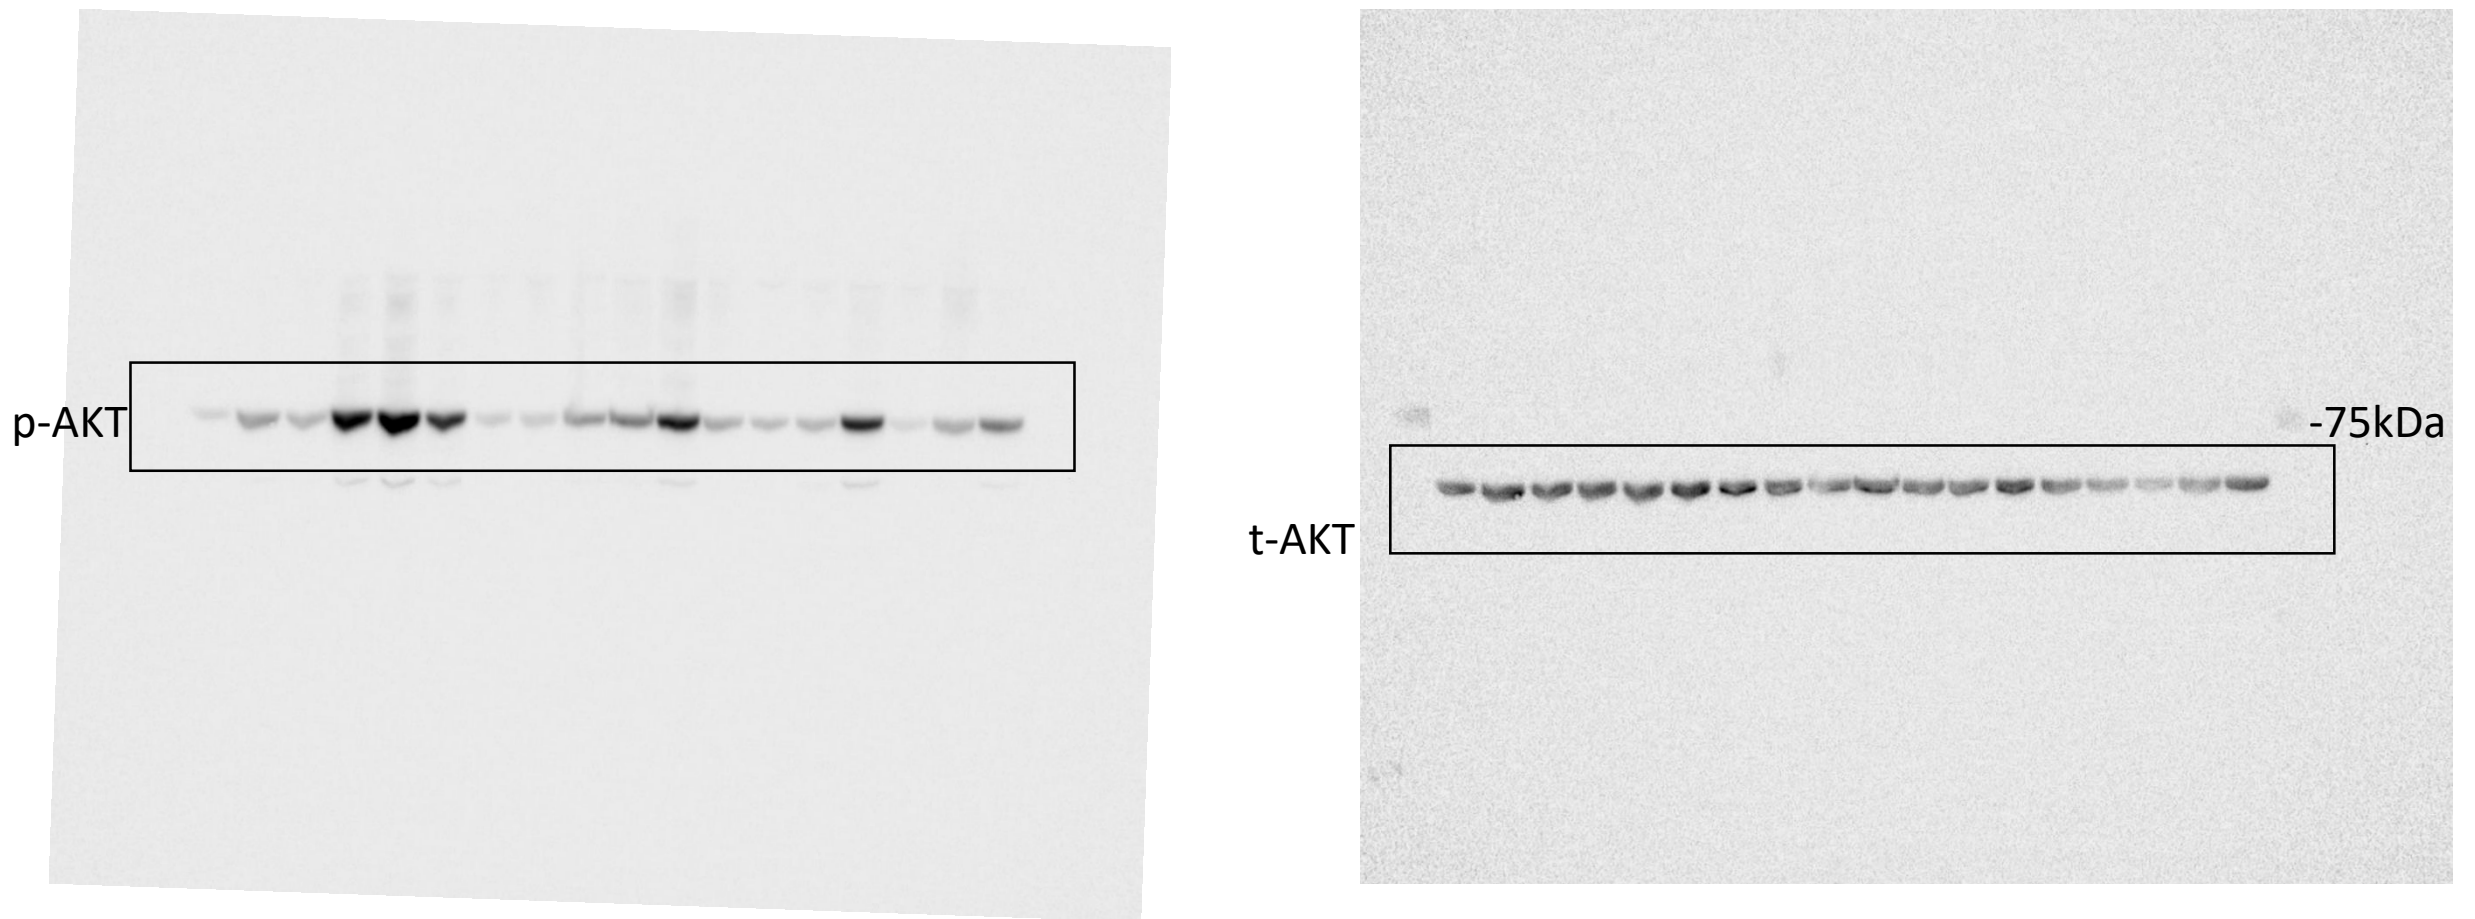

# Extended Data Figure 3n

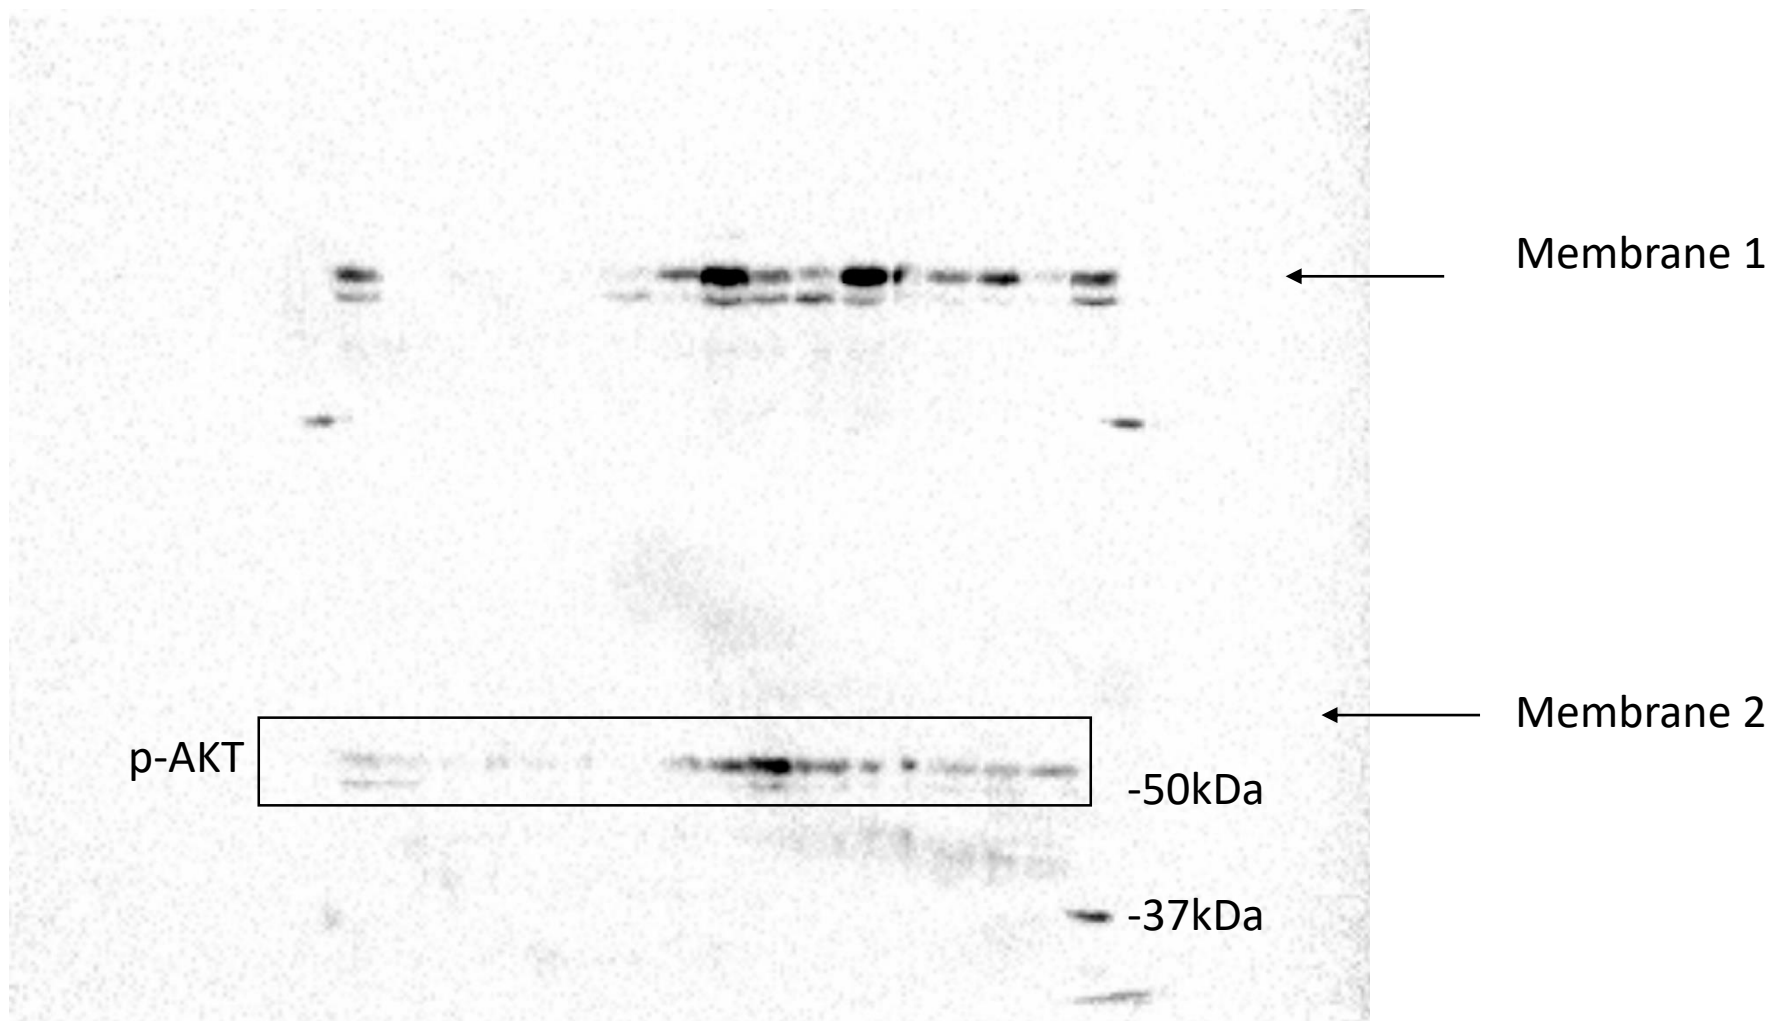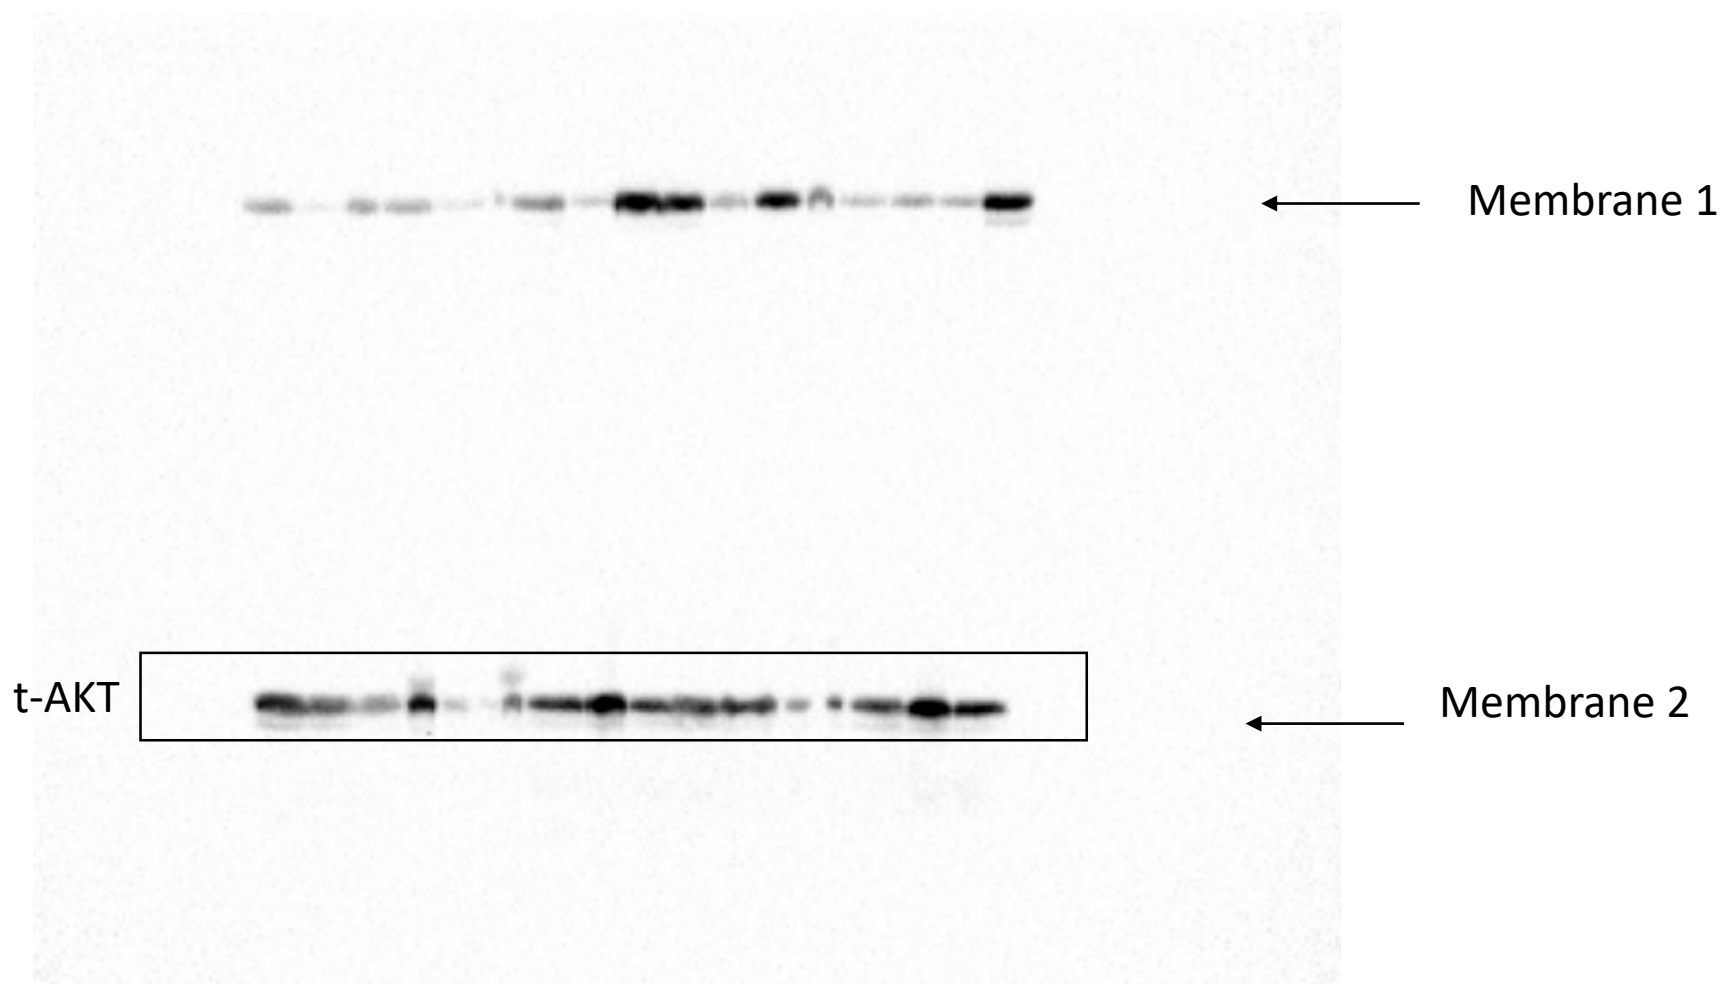

Supplement: EMS143944-supplement-Uncropped_WesternBlot_Extended_DataFigure3l_m_n.pdf [file EMS143944-supplement-Uncropped_WesternBlot_Extended_DataFigure3l_m_n.pdf]

# Extended Data Figure 4g

## Chow

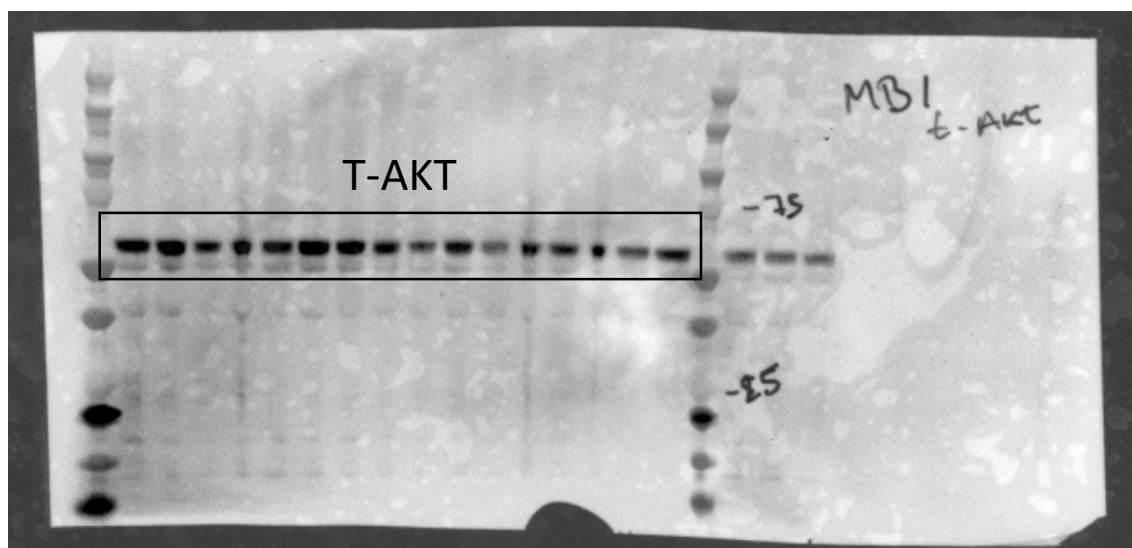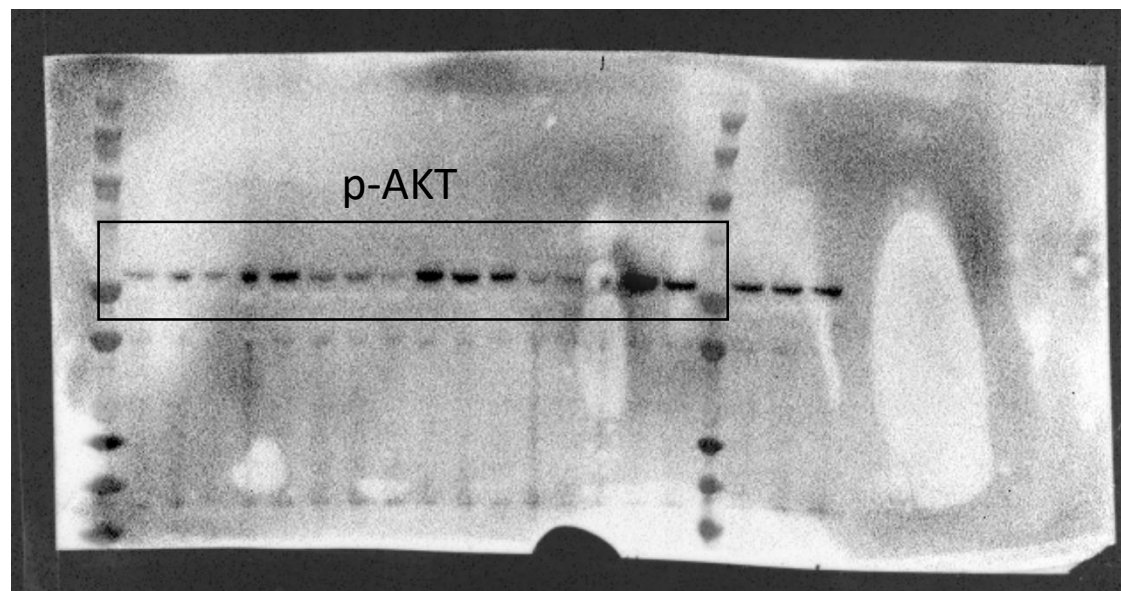

## HFD 58%

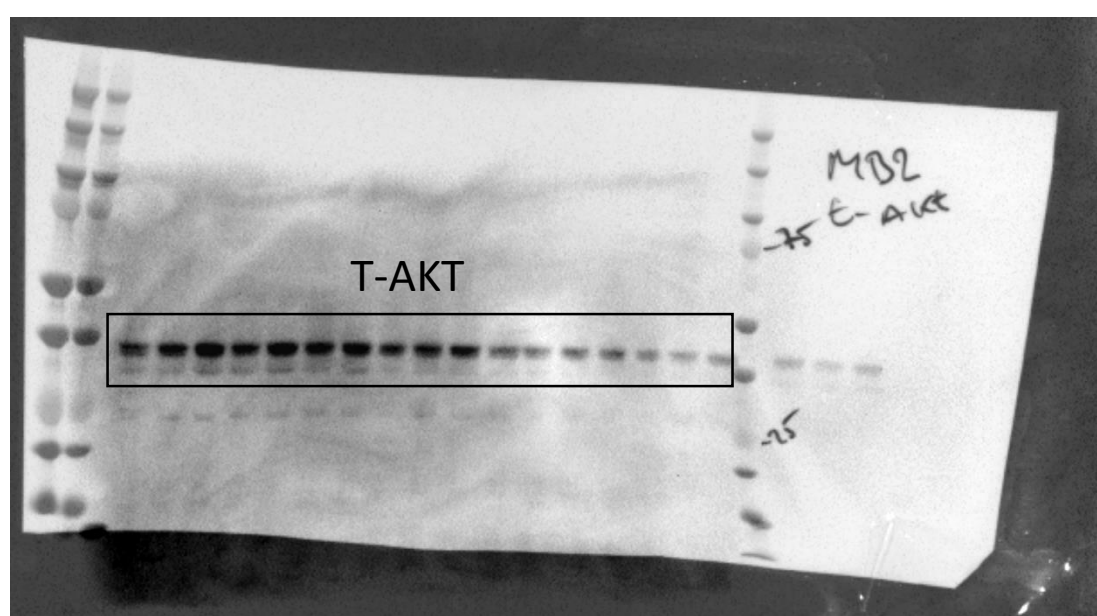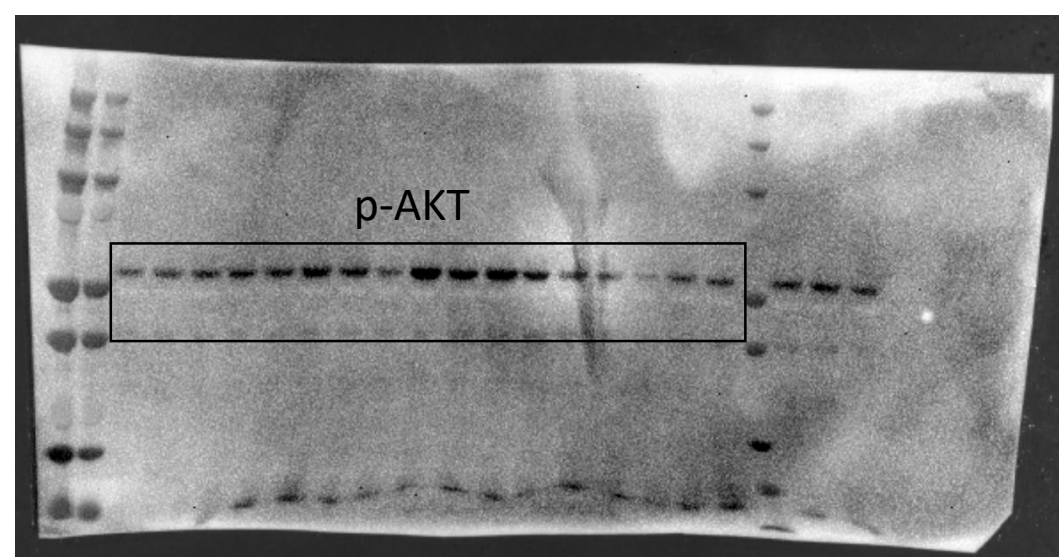

Supplement: EMS143944-supplement-Uncropped_WesternBlot_Extended_DataFigure4g_.pdf [file EMS143944-supplement-Uncropped_WesternBlot_Extended_DataFigure4g_.pdf]

## Extended Data Figure 5s

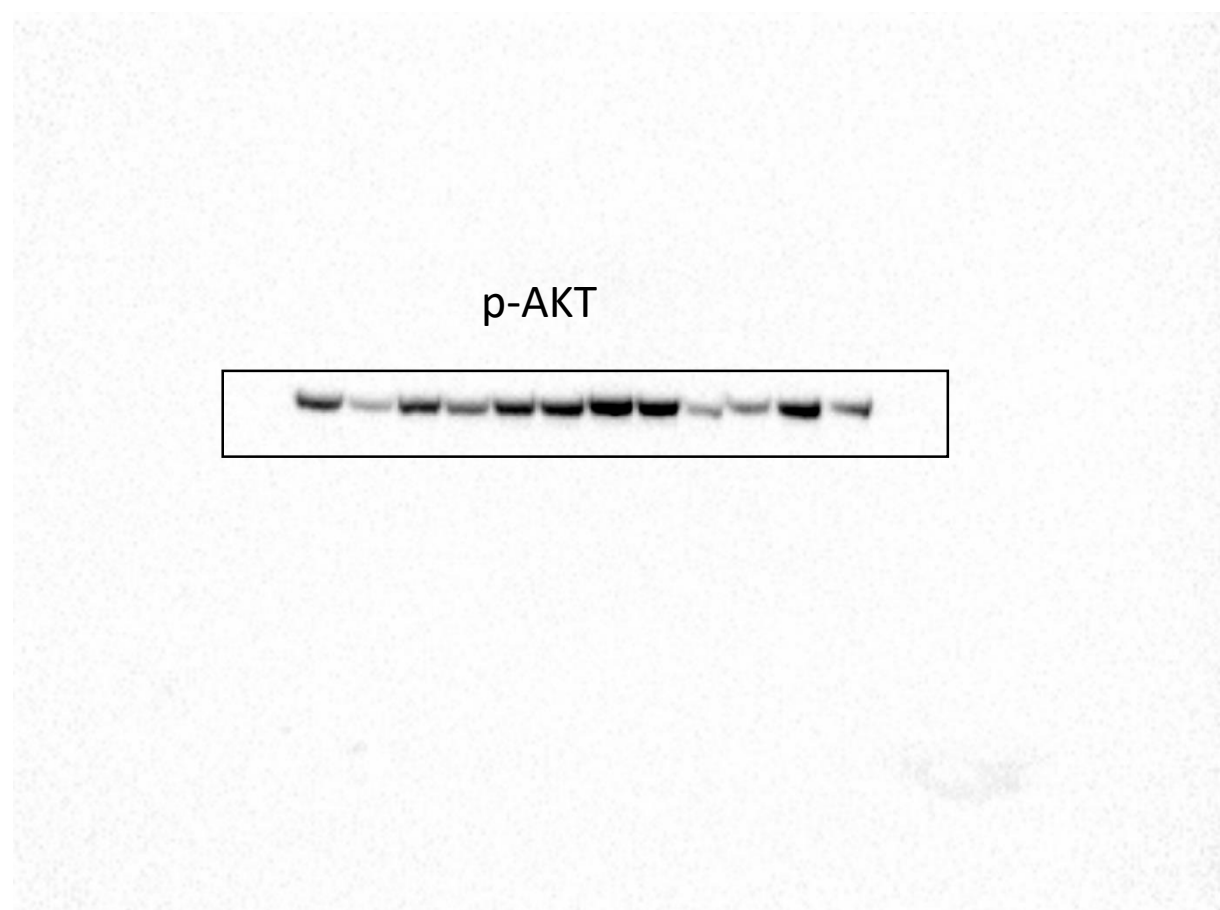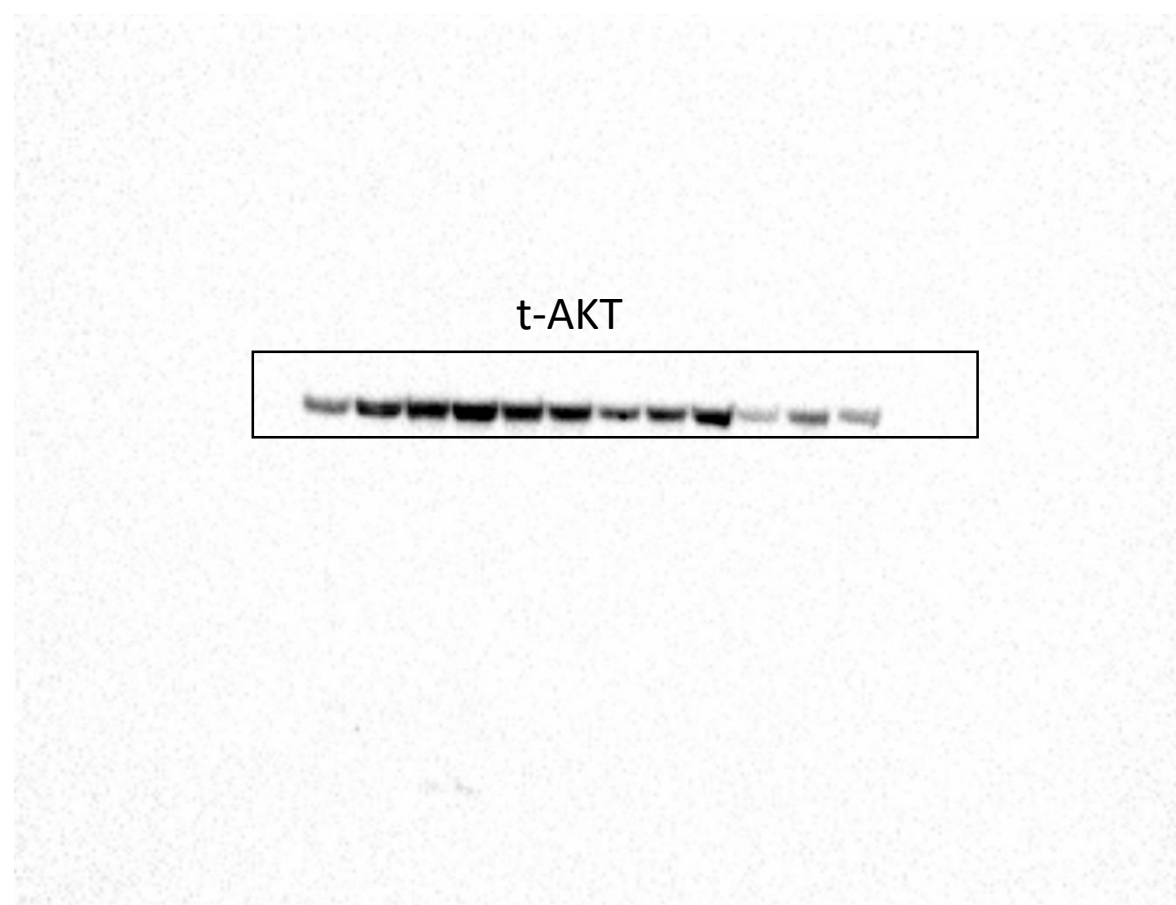

Supplement: EMS143944-supplement-Uncropped_WesternBlot_Extended_DataFigure5s.pdf [file EMS143944-supplement-Uncropped_WesternBlot_Extended_DataFigure5s.pdf]

# Extended Data Figure 6d

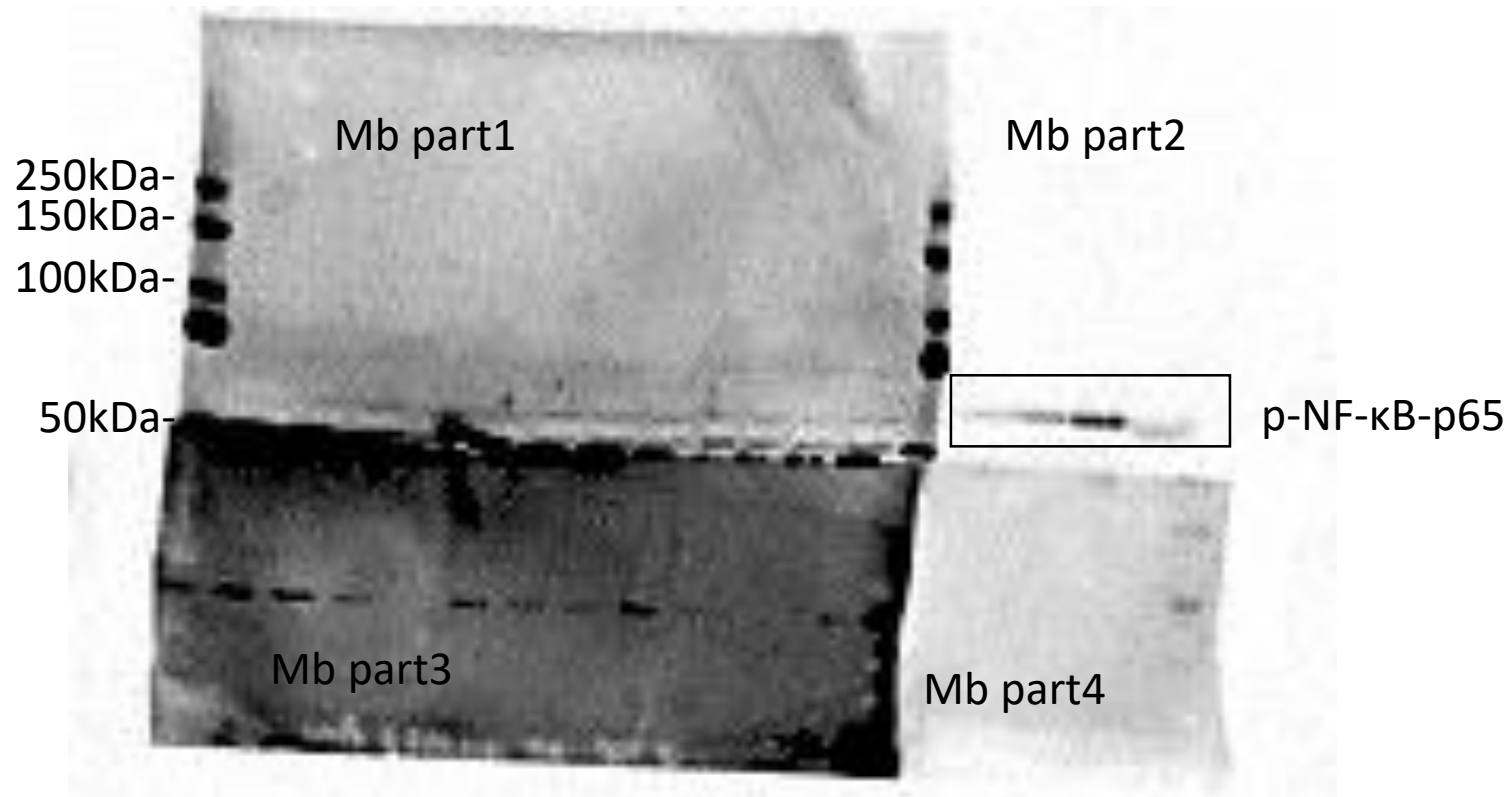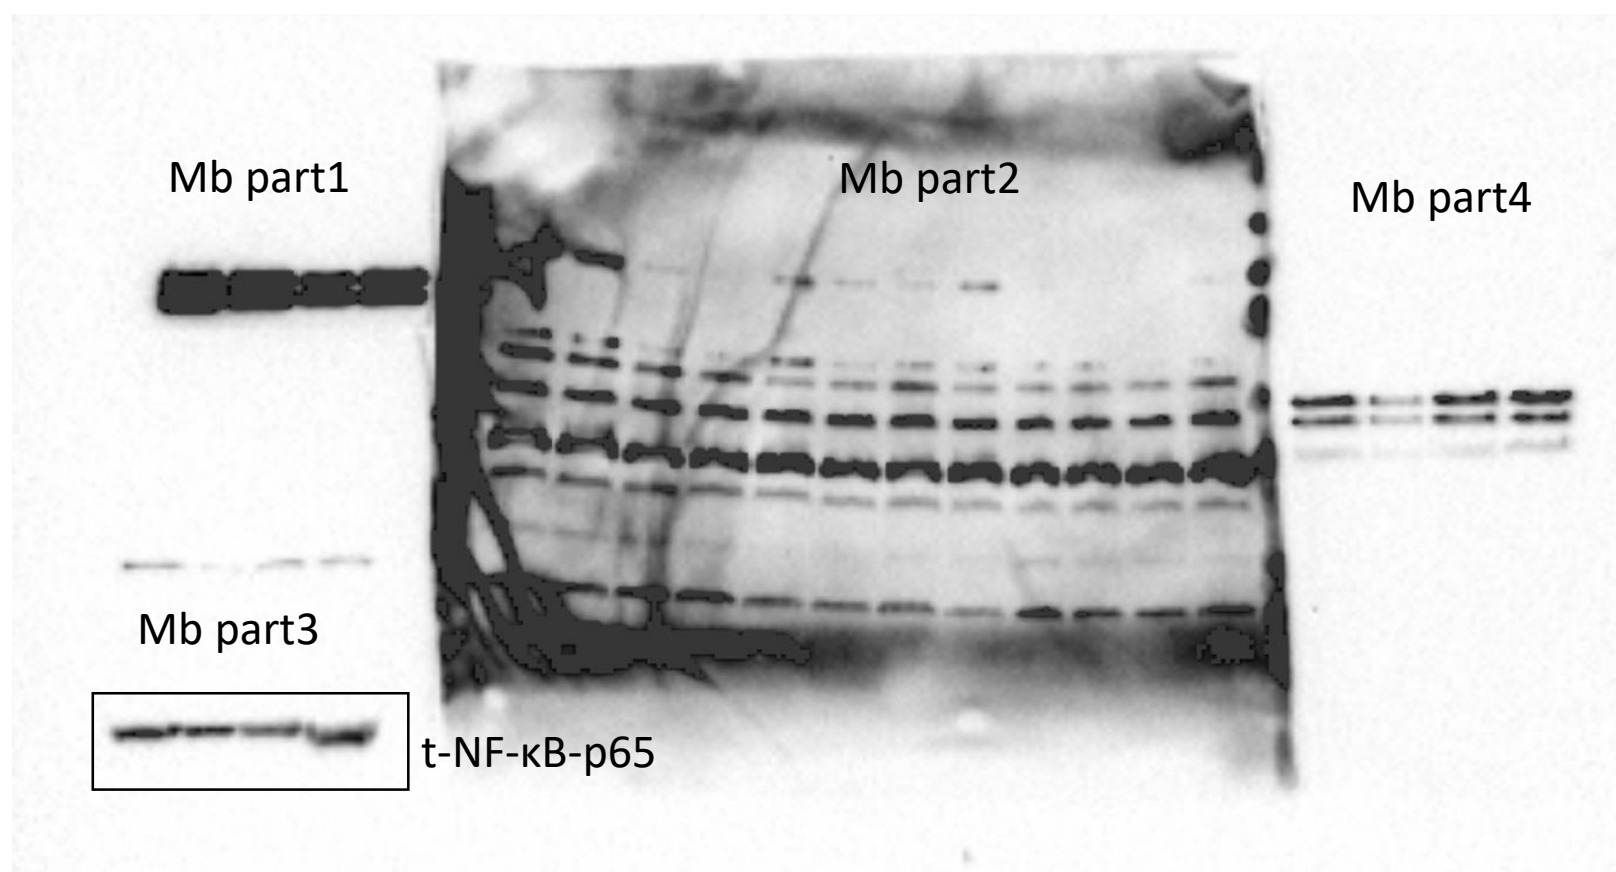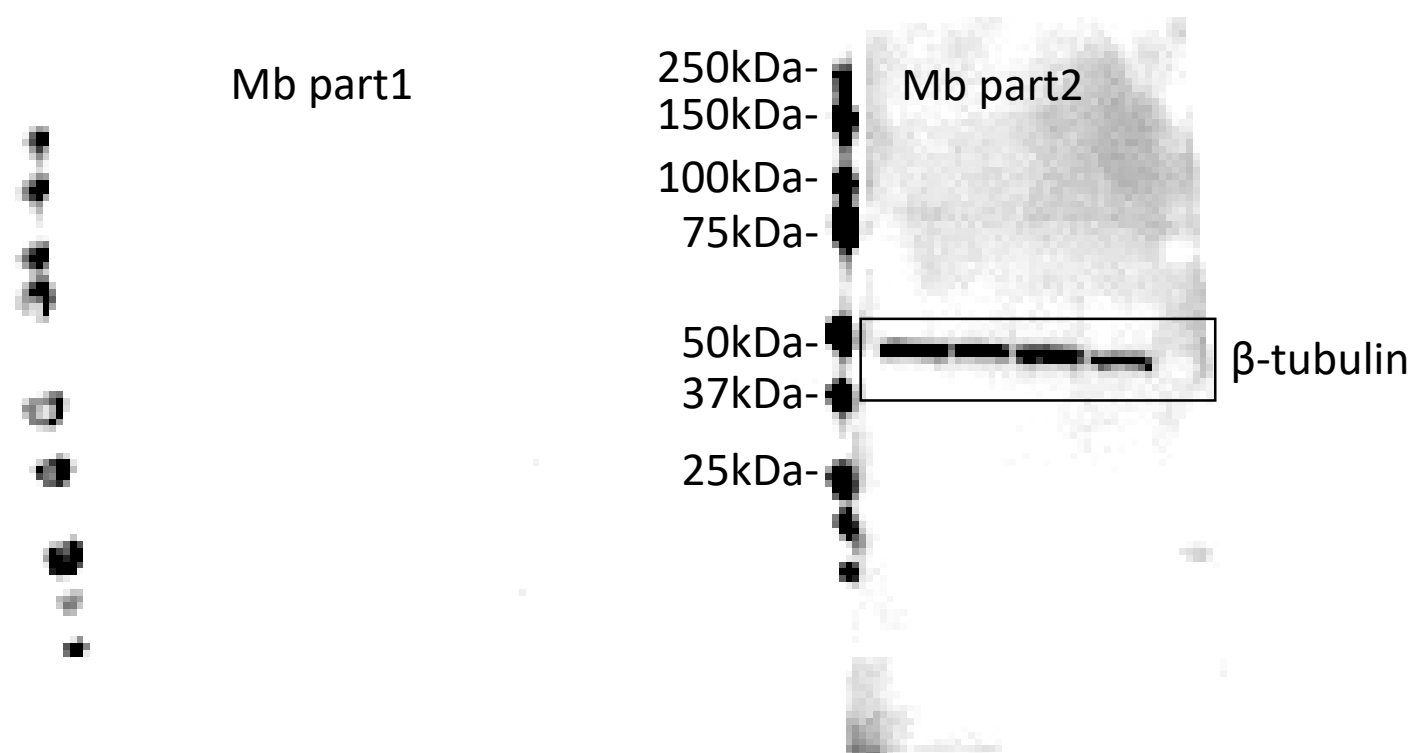

Supplement: EMS143944-supplement-Uncropped_WesternBlot_Extended_DataFigure6d.pdf [file EMS143944-supplement-Uncropped_WesternBlot_Extended_DataFigure6d.pdf]

**Figure 3h**

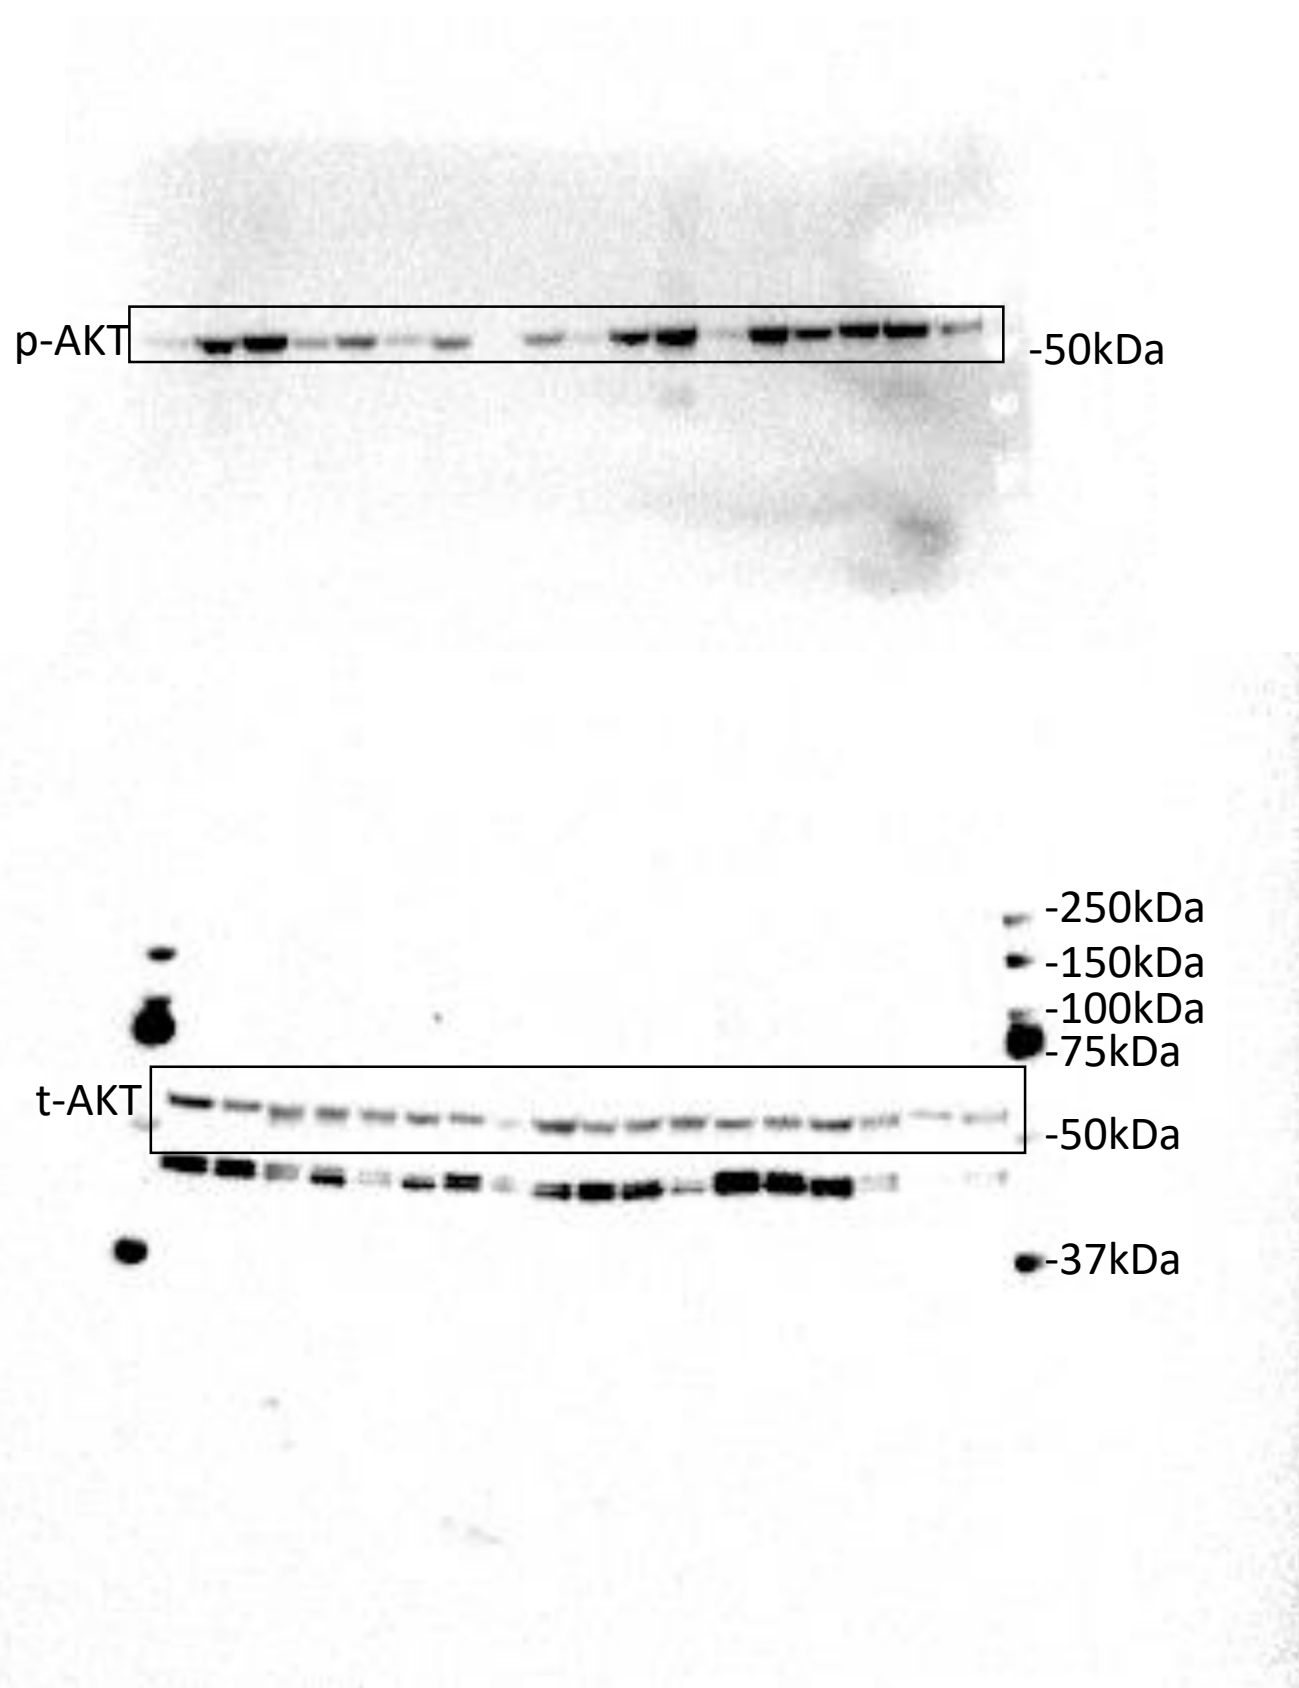

Supplement: EMS143944-supplement-Uncropped_WesternBlot_Figure3h.pdf [file EMS143944-supplement-Uncropped_WesternBlot_Figure3h.pdf]

Figure 5h

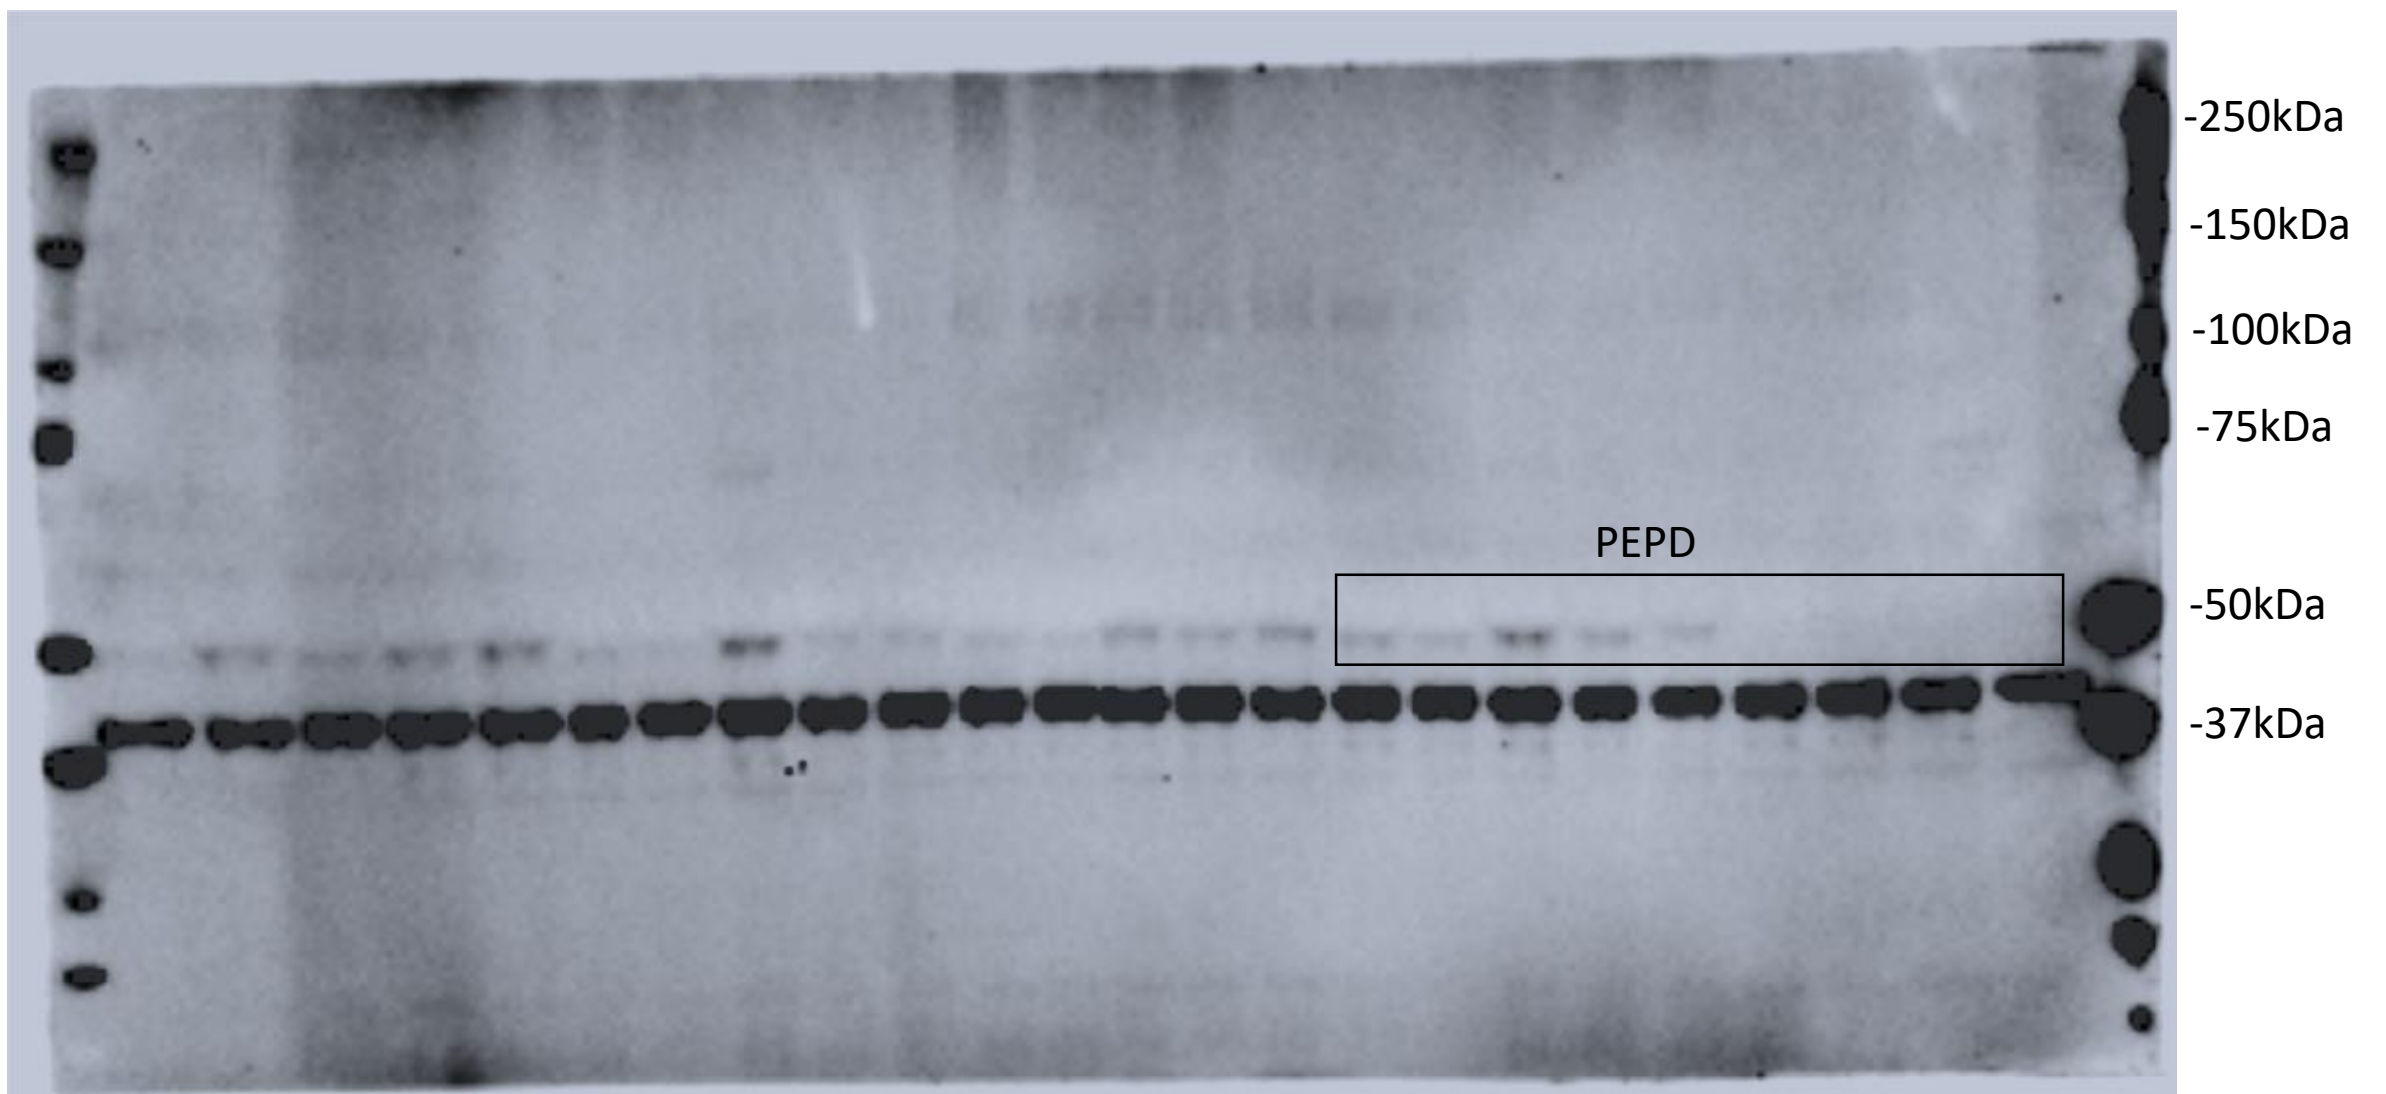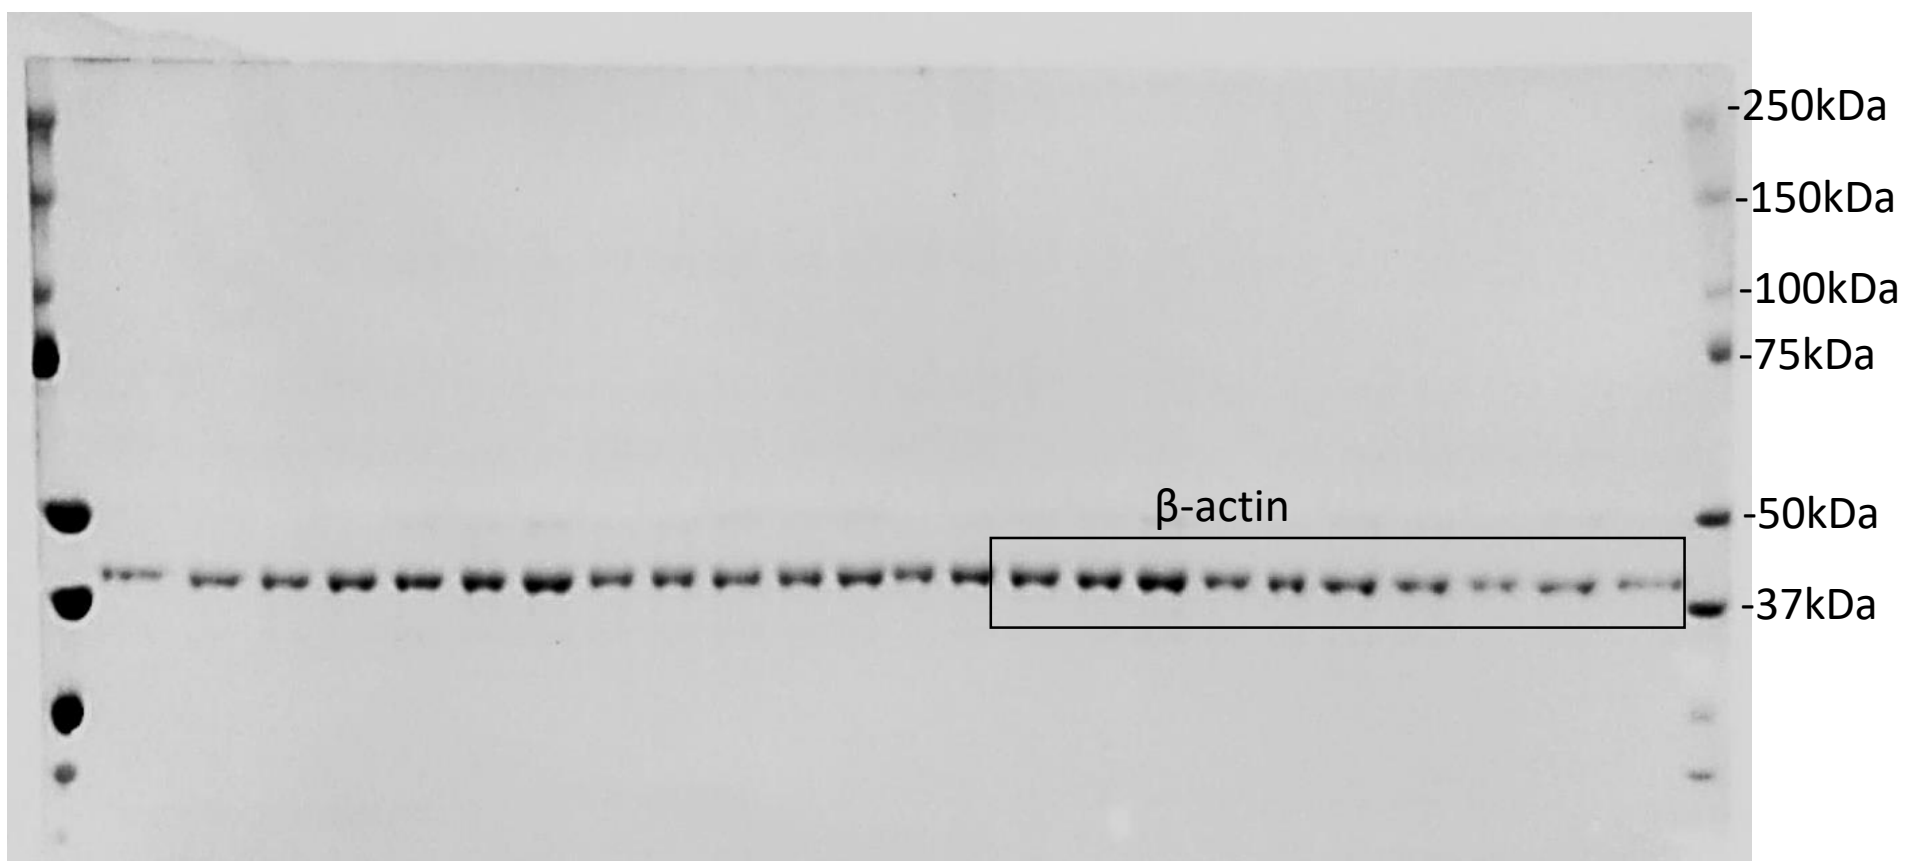

Supplement: EMS143944-supplement-Uncropped_WesternBlot_Figure5h.pdf [file EMS143944-supplement-Uncropped_WesternBlot_Figure5h.pdf]

**Figure 6b**

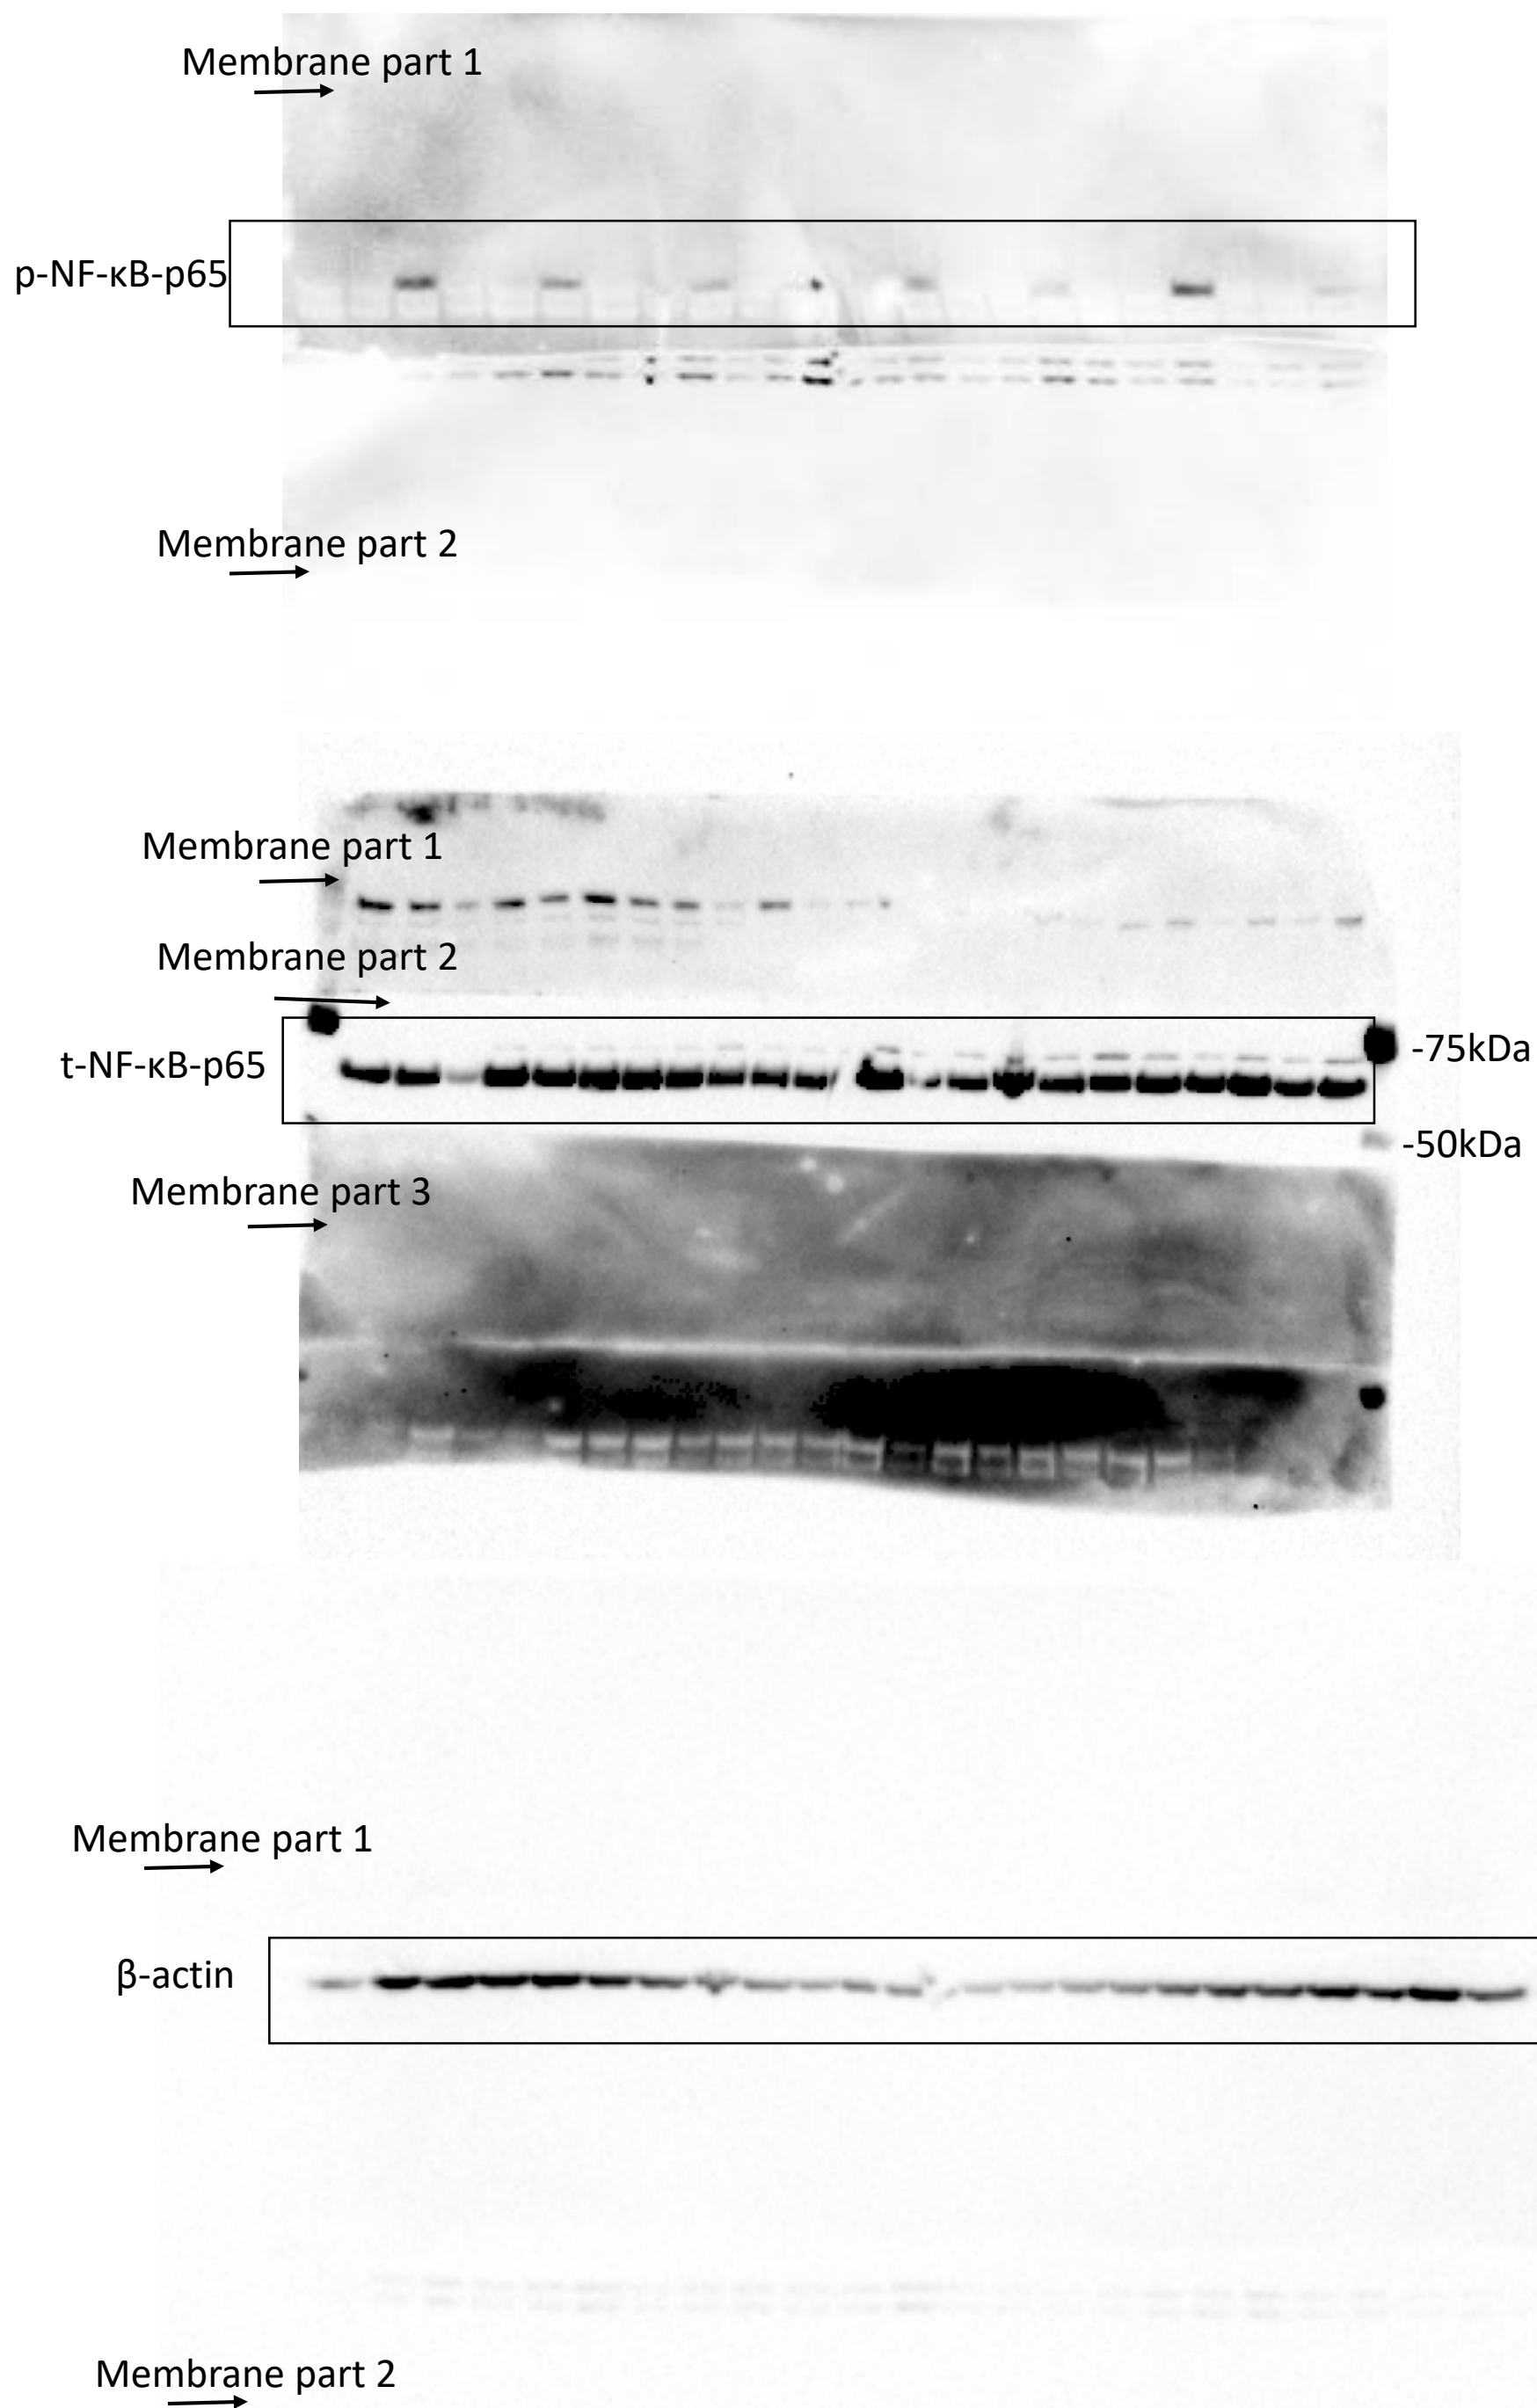

**Figure 6i**

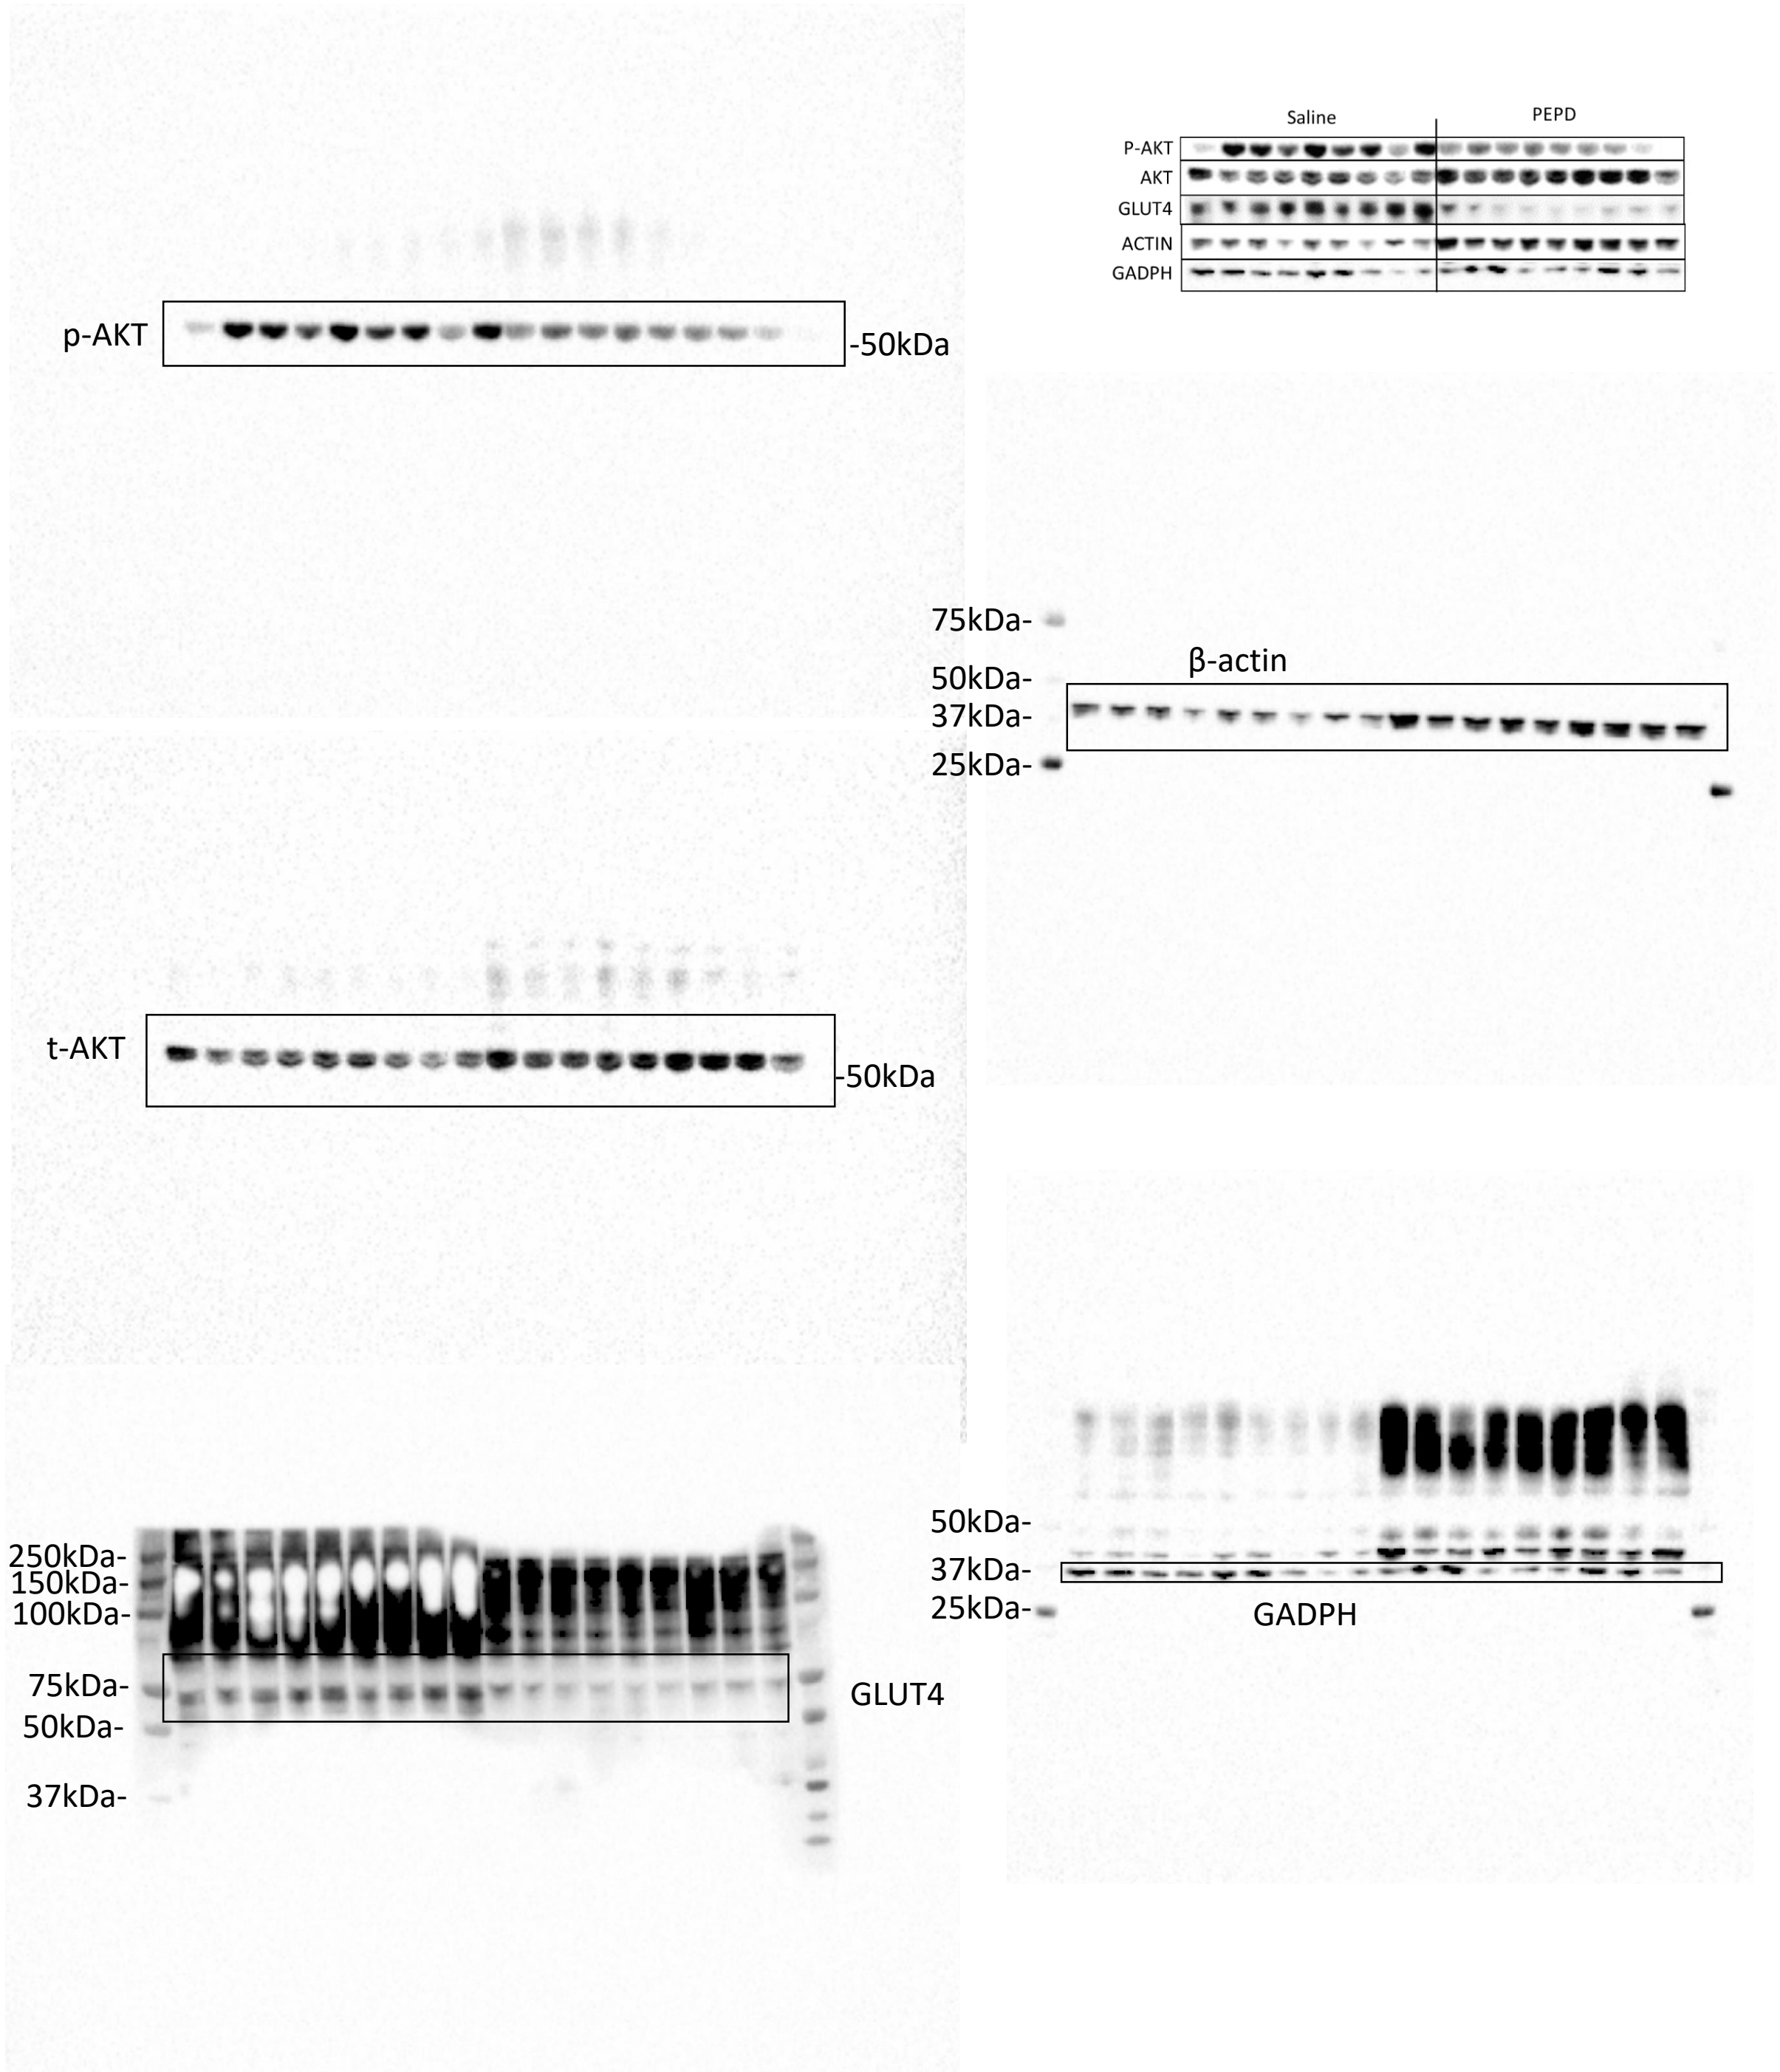

Supplement: EMS143944-supplement-Uncropped_WesternBlot_Figure6b_i.pdf [file EMS143944-supplement-Uncropped_WesternBlot_Figure6b_i.pdf]
